# Supplementary material
Source: ML conference proceedings conference paper supplement (https://openaccess.thecvf.com/content/CVPR2024/html/Zhu_Part-aware_Unified_Representation_CVPR_2024_paper.html)
Supplement: Supplementary file 1 [file gpt3_desc.xlsx]

## Sheet: Kinetic-skeletons
Action Labels	Head	Hands	Torso	Legs	Start	Middle	End	Global Desc
abseiling	Maintain a steady focus forward, turning as needed.	Grip tightly onto the rope, controlling the speed of the descent.	Lean back slightly to avoid pulling down on the rope.	Be used for balance and fine motor control as the rope is wrapped around.	attach the rope.	lower themselves down.	detach the rope before reaching the bottom.	descend a cliff face while attached to a rope.
air drumming	move in time with the beat from side to side.	move in quick rhythmic motions, striking the air in various patterns.	bob and weave as the head and arms move.	bounce or move in minimal ways to the beat.	bring their hands up next to their head, palms facing each other.	simulate drumming their palms on an imaginary drumset.	then move their hands back and away from each other.	rhythmically move their arms in the air as if they were playing a drum set.
answering questions	Move slightly forward.	Clasp together or gesturing during speaking.	Shift forward and back slightly.	Remain stationary.	listen to the question.	formulate a response.	provide the answer.	be answering questions.
applauding	Nod in approval.	Clap together.	Lean forward slightly.	Remain in a stationary position.	raise their hands.	clap their hands.	lower their hands.	clap their hands.
applying cream	Tilts downwards towards the jar of cream.	Grasp the jar of cream and rub the cream into the hands and palms.	Move side to side to reach all areas of the body.	Remain still and support the body when applying the cream.	pick up the cream.	spread the cream.	massage the cream in.	apply cream.
archery	Maintain a steady gaze upon the target.	Draw the bowstring back and release it smoothly.	Remain upright and twist slightly for accuracy.	Remain stationary and provide stable support.	nock the arrow on the bowstring.	draw the bow and aim at the target.	release the arrow and follow through.	draw a bow and aim at an archery target before releasing an arrow.
arm wrestling	Remain still.	Clasp the opposing arm and push downward.	Lean in to provide more strength.	Apply pressure to the floor to provide balance.	grab their opponent's arm with their own.	struggle against their opponent in an attempt to pin down their own arm.	release their grip when their opponent's arm has been pinned or they have conceded.	be pushing their arm against another person's arm in an attempt to win the arm-wrestling contest.
arranging flowers	tilt and turn to better observe bouquet.	reach out to grasp stems of flowers, position and arrange them.	twist and turn to maintain balance and reach different flowers.	remain stationary as the rest of the body moves.	select the flowers.	arrange the flowers in a vase.	place the vase with the flowers on display.	be arranging flowers.
assembling computer	tilt to observe the components from different angles.	lift, connect, and insert components.	lean in to access and adjust components.	remain stationary for stability.	identify components and parts.	physically assemble the hardware.	install the necessary software.	assemble components to build a computer.
auctioning	raise to signal bidding.	wave or point to indicate bids.	lean forward in anticipation.	remain still to maintain balance.	raise their arm.	slowly lower their arm.	declare the item as sold.	make short, emphatic bids, raising their hand or voice to signal their offer.
baby waking up	Lift up and turn from side to side.	Clench and unclench.	Sway from side to side.	Kick and twitch.	stir and begin to wake up.	stretch arms and legs.	start to open eyes.	slowly slowly wake up.
baking cookies	tilt downwards to read the recipe.	measure ingredients, mix them together, move the dough around and press it into shape.	bend forward when reaching for ingredients and when reading the recipe.	remain still to support the weight of the upper body.	gather ingredients.	mix and bake the cookies.	let the cookies cool before serving.	mix, measure, pour, bake, and decorate cookies.
balloon blowing	Tilt the head slightly back and open the mouth.	Make a circle with the fingers and thumbs and hold it steady.	Lean forward to aide in blowing the air into the balloon.	Remain relatively still while the other body parts move.	inflate the balloon with air.	tie off the end of the balloon.	let go of the balloon and let it fly.	blow up and release a balloon.
bandaging	Move to the side to allow for the bandage to be wrapped around the body.	Wrap and tie the bandage securely.	Remain stationary while the bandage is applied.	Move to allow the bandage to reach the desired area.	unwrap a bandage.	secure the bandage around the wound.	tie off the bandage tightly.	wrap cloth around a wound in a careful and methodical way.
barbequing	tilt forward to inspect food being cooked.	move close to the heat source to turn food items.	twist back and forth to move closer or farther from the heat source.	step back and forth to move around while barbequing.	light the charcoal.	place the food on the grill.	cook the food until done.	be grilling.
bartending	Tilt and twist to pour drinks.	Reach for bottles and glassware, shake cocktails, and pour drinks.	Lean forward to reach across the bar, lift heavy items, and mix drinks.	Move around the bar area to stock and restock inventory, help customers, and finish side tasks.	prepare drinks.	serve drinks.	collect payment.	be pouring drinks and mixing cocktails.
beatboxing	Move slightly with the music, keep rhythm with head nodding and body swaying.	Be used to clap rhythms, create sound effects and control basic sound mechanics with the mouth.	Move to the beat and create a feel for the music as the user beatboxes.	Remain relatively stationary, though some users may use their legs for further sound effects.	make a rhythmic pattern of vocal sounds.	imitate drum machine sounds and other effects.	incorporate other elements, such as lip smacking, tongue clicks, and vocal basslines.	rhythmically vocalize various sound effects and drum patterns.
bee keeping	Lift and tilt to observe beehive treetops and assess apiary locations.	Manipulate beekeeping tools, such as protective beekeeping suits, bee smoker, hive tool and hive frames.	Bend and twist to inspect and maintain beehive equipment.	Walk to bee sites and stand to inspect beehive frames in place.	acquire beehives and bees.	maintain the hives and collect honey.	use the honey for sale or personal use.	collect honey and maintain the bee hive.
belly dancing	Turn, nod, and tilt from side to side.	Move in circles and in intricate gestures, often mimicking animal motions.	Twist, hop, and shimmy from side to side.	Move in isolation, often with alternating stomps and soft taps.	raise their arms above their head and sway their hips in a circular motion.	step with their left foot to the side and hip circle with their right hip.	step with their right foot to the side and hip circle with their left hip.	move their torso and hips in a rhythmic, undulating manner.
bench pressing	Remain stationary.	Push the barbell away from the chest in an upward motion.	Push off the bench and arch the back to complete the lift.	Push against the floor for increased stability.	lower the barbell to their chest.	press the barbell upwards.	return the barbell to starting position.	push upward and then lower their arms.
bending back	tilt backward.	lift backward and upward.	arch backward.	straighten and lift backward.	lean backward.	arch their back.	straighten out.	be bending backward.
bending metal	keep still, with face focused on the job.	grip the metal firmly and use controlled movements to bend.	twist to bring the hands closer or further away from the bending metal as necessary.	remain stationary, balanced and support the torso throughout the action.	grasp the metal.	manipulate it into shape.	release the metal.	bend metal.
biking through snow	Remain firmly upright, steering the handlebars.	Push/pull the handlebars to control direction.	Remain upright and upright to maintain balance.	Pedal powerfully to propel the bike forward.	pedal vigorously.	force the bike through the softening snow.	gain some traction and gradually pick up speed.	be biking steadily through the snow.
blasting sand	Snap back upon impact.	Pull back quickly away from the sand.	Twist when gesturing to throw the sand.	Stabilize the body, ready to move.	prepare and load the sand.	blast the sand with high pressure.	clear away the sand afterwards.	blast sand.
blowing glass	Move in a circular motion to rotate the blowpipe.	Move in a precise manner to control the shape of the molten glass.	Lean forward to provide support to the arms and blowpipe while blowing.	Remain planted and stable to provide a strong base for the motion of the upper body.	heat the glass in a furnace.	shape the glass with a blowpipe.	finish the piece with tools and coldworking techniques.	blow air through a tube to shape and form molten glass.
blowing leaves	Move side-to-side when directed by hands.	Swing arms back and forth to create gusts of air.	Twist and turn with the arms to generate momentum for the leaves.	Shift and rotate to help balance the body.	pick up the leaves.	blow the leaves away.	bag the leaves.	sway side to side, sweeping the fallen leaves away with each breath.
blowing nose	tilt slightly back.	move up to cover the nose and pinch nostrils slightly.	remain upright and still.	remain in place and stationary.	raise their hand to their nose.	blow their nose.	lower their hand from their nose.	blow their nose.
blowing out candles	Remain mostly still.	Extend forward to reach for the candles.	Lean forward slightly as the arms reach out.	Remain mostly still.	bring a breath towards the candles.	exhale hard, blowing out the flames.	take their breath away from the candles.	be inhaling deeply then exhaling sharply to blow out the candles.
bobsledding	Remain pushed back and upright.	Grip onto the handles using a firm grip.	Thrust forward and back with each wave or bump.	Use a combination of pushing and bracing against the sides of the sled.	jump into the bobsled.	take turns steering and braking the bobsled.	reach the finish line.	swiftly move down an icy track in a sled.
bookbinding	Move up and down to see book pages.	Grip the book and apply adhesive.	Twist slightly to reach book pages.	Remain stationary and provide stability.	gather the pages together.	attach the spine of the book.	cover the book in a protective material.	bind texts together to form books.
bouncing on trampoline	Bounce up and down forcefully.	Push against the trampoline to propel the body up.	Move with the bouncing head, hands, and legs.	Push off the surface of the trampoline to maintain the bouncing motion.	jump onto the trampoline.	spring up and down.	land on the trampoline.	be bouncing up and down on the trampoline.
bowling	Stay stationary while the arms and legs move.	Move in a bowling motion to roll the ball down the lane.	Rotate slightly during the bowling motion.	Provide the momentum to propel the ball forward.	take a few steps towards the bowling lane.	roll the ball down the lane.	wait to see how many pins were knocked down.	roll a bowling ball down a lane towards pins.
braiding hair	Remain still and upright.	Cross strands of hair over each other and pull back tightly.	Bend slightly forward to provide access to the back of the head.	Remain stationary.	separate the hair into three sections.	intertwine the sections over and under each other.	tie off the end of the braid.	interweave strands of hair.
breading or breadcrumbing	move upward slightly and tilt from side to side.	move quickly in a “patting” or “scrunching” motion to break up the bread.	remain still and bent slightly over the bowl, with arms at the sides.	remain still and planted on the ground for support.	make sporadic contact with another person in order to lead them on.	withdraw just enough to keep the other person interested.	neglect any commitment or responsibility expected from them.	send flirtatious, sporadic text messages to keep their interest or presence known.
breakdancing	Quickly jerk up and down.	Exercise rapid spinning, popping, and locking motions.	Move horizontally to the beat of the music while isolating the upper and lower body.	Perform twists and squats while swift movements are made to the back and forth.	spin on the ground.	pop and lock their body.	freeze in a pose.	spin on the floor while rapidly alternating between pushing their body up and down, creating intricate footwork patterns.
brush painting	Make subtle shifts to observe the painting from different angles.	Move a brush in a sweeping or dabbing motion to apply paint.	Twist slightly to the side or lean in for a closer inspection.	Remain in a stable, balanced position.	dip their brush in paint.	apply the paint to the canvas.	use the brush to blend the colors together.	make small brush strokes in a sweeping, circular motion.
brushing hair	Move slightly from side to side.	Pull the hairbrush through the hair in even strokes.	Lean slightly forward to enable better reach to the hair.	Remain stationary for stability.	pick up the brush.	brush their hair.	put down the brush.	brush their hair.
brushing teeth	Nod forward and back slightly.	Move in circular motions to brush the teeth.	Remain upright and remain still.	Remain stationary.	pick up a toothbrush.	brush their teeth.	rinse their mouth.	brush their teeth.
building cabinet	Nod in agreement.	Reach for tools and materials, as well as assemble and shape parts of the cabinet.	Twist to reach into corners and adjust objects.	Support the body while performing tasks that require a steady stance.	measure the area where the cabinet will be built.	assemble the pieces of the cabinet.	install the finished cabinet in the measured area.	be assembling and constructing a cabinet.
building shed	Move side to side to plan and design the shed.	Be used to pick up and assemble the necessary parts of the shed.	Bend and twist to fit and secure the pieces together.	Stand to hold up the hammer and saw while reaching and cutting the lumber.	gather materials and tools.	construct the shed.	finish with painting and decorating.	build a shed.
bungee jumping	Move up and down as a result of the jump.	Extend outwards and grip the bungee cords during the jump.	Follow the natural arc of the jump, stretching out and compressing during the descent.	Remain straight and pointed downwards during the jump.	leap off the jump platform.	swing downward before bouncing back up.	be safely slowed to a stop by the bungee cord.	jump off a platform with a stretchy cord tied around their waist, resulting in a freefall followed by a bouncing rebound.
busking	Lift and tilt in time with the music.	Wave and move in different directions to emphasize certain beats or sections.	Twist and move to match the rhythm.	Take on a variety of positions, from hopping to shuffling.	set up their instrument or other performance setup.	begin to perform their music or show.	collect donations from the audience.	play music in a public place to earn money.
canoeing or kayaking	Remain mostly stationary and inline with the body.	Alternately paddle through the water with a stroke.	Remain mostly stationary while transferring power from the arms and legs to the paddle.	Remain stationary while helping to balance and stabilize the body.	put the canoe or kayak into the water.	start paddling in their chosen direction.	navigate the waterway and eventually return back to the starting point.	paddle along in a canoe or kayak.
capoeira	Perform fluid and quick spins, dips, and tosses.	Execute fast and precise strikes, blocks, and sweeps.	Twist and turn with grace and precision.	Perform quick and powerful kicks, jump kicks, and swift footwork.	jump and twist their body gracefully.	then raise their legs in spinning kicks.	then perform intricate footwork and cartwheels.	move with fluid, acrobatic rhythm, combining martial arts and dance.
carrying baby	Tilt slightly forward to support the weight of the baby.	Lift and cradle baby, distributing the weight evenly.	Bend slightly and tuck the arms close to the body.	Bend slightly to keep body balanced and prepare for movement.	reach out to pick up the baby.	cradle the baby in their arms.	walk around with the baby.	be carrying a baby.
cartwheeling	Rotate through the air in an arch.	Be placed palms flat on the ground and rotate around in a circular motion.	Follow the hands in a circular movement.	Follow the hands in a circular movement and straighten out when the hands reach the ground.	start on two feet.	lift one leg and swing them over their head.	then land on their hands and feet.	spin around while executing a forward somersault with hands and feet alternating.
carving pumpkin	Move side to side to shape the face.	Scoop out the insides of the pumpkin with a spoon.	Lean in and rock back and forth to push the spoon around.	Remain anchored to the ground to support the upper body.	outline the design with a marker.	carve along the lines.	remove the pieces of pumpkin.	be delicately carving the pumpkin.
catching fish	Turn to follow the fish.	Reach out to grab it.	Bend forward towards the fish.	Remain stationary to provide support.	cast their line into the water.	wait for a fish to bite their bait.	reel in the fish.	throw a line into the water and then quickly reel it in, trying to catch a fish.
catching or throwing baseball	Follow the trajectory of the ball with nodding and turning.	Reach out and grasp the ball, or throw it with a fast wrist snap.	Remain upright and flex the shoulders and back as the arms move to catch and throw.	Lean in and forward to gain momentum to catch and throw.	lift their arm back to prepare.	reach out to catch/throw the baseball.	follow through with their arm action.	throw or catch a baseball.
catching or throwing frisbee	Turn to track the Frisbee.	Reach out to catch or throw the Frisbee.	Twist to create momentum for the throw or shift weight forward for the catch.	Move to help generate momentum for the throw or provide a stable base for the catch.	raise their arm to prepare for the catch.	extend their arm and hand to receive or launch the frisbee.	lower their arm as the frisbee moves away from them.	throw and catch a frisbee.
catching or throwing softball	Move slightly to track the ball.	Reach forward and extend quickly to catch or throw the ball.	Twist and bend slightly to assist with balance and range of motion.	Plant firmly to the ground to generate the momentum needed for throwing or catching the ball.	wind up their arm.	throw or catch the softball.	follow through with the motion.	throw or catch a softball.
celebrating	Push backward slightly and raise chin.	Throw arms up in the air in celebration.	Arch back and twist side to side.	Jump up and down or do a little dance.	dance joyfully.	sing loudly.	shout happily.	be jumping up and down, waving their arms, and laughing.
changing oil	guide the hands in the task.	unscrew oil filters, measure and pour in oil.	bend or twist in order to reach difficult areas.	support the body in various positions during the task.	gather the necessary materials.	drain the old oil and replace with new.	dispose of the old oil properly.	lift the car, open the oil pan, drain and replace the oil, and reclose the pan.
changing wheel	Lean forward.	Reach down and grip the wheel.	Bend to allow arms to move towards wheel.	Remain steady and serve as the base for the movement.	prepare the tools and jack.	remove the wheel and place the spare.	lower the car and tighten the lugs.	lift the wheel off, replace with a new wheel, and secure it in place.
checking tires	Move slightly to adjust for seeing the tire more closely.	Bend down to check the tire pressure and inspect the tire for any signs of damage.	Lean forward and twist slightly for a better angle of view.	Remain stationary, occasionally bending slightly for a closer look.	inspect the treads of the tires.	check the tire pressure.	check the sidewalls for any signs of damage.	inspect the tires.
cheerleading	Move side to side and in circles.	Wave to the crowd and move energetically alongside the music.	Twist and turn while keeping the head and hands moving.	Perform a variety of stunts, jumps, and kicks.	raise their arms and jump into the air.	clap and shout encouragements.	land with their feet together and their arms extended in a V-shape.	jump, kick, and perform synchronized dance moves.
chopping wood	Move up and down while looking at the block of wood to be chopped.	Lift the axe up and then forcefully bring it down on the wood.	Twist from side to side for better leverage when swinging the axe.	Remain planted firmly on the ground, providing stability.	raise their axe.	swing the axe to chop the wood.	repeat the motion.	chop wood with an axe.
clapping	Remain still	Move together in a clapping motion	Remain still	Remain still	raise their hands.	bring their hands together.	let their hands separate.	clap their hands rapidly.
clay pottery making	Steadily hold bowl while shaping with fingers.	Use thumb and fingers to create smooth, intricate patterns.	Remain stead to provide support and control to the hands.	Remain still to provide stability and allow precise movements of the hands.	select the right clay for the project.	shape and form the clay.	fire and finish the pottery.	shape and mold clay into pottery.
clean and jerk	Move backwards and downwards as the bar is brought overhead.	Grab the barbell and drive upwards until arms are locked out.	Remain upright and stationary as the bar is jerked overhead.	Push downwards and generate upward momentum to drive the barbell overhead.	clean the barbell up to the shoulders.	tightly grip the barbell and explosively extend their body upwards.	jerk the barbell to arm's length overhead.	lift a barbell from the ground to the shoulders and then jerk it overhead.
cleaning floor	Move side-to-side and up-and-down to observe the area being cleaned.	Move back and forth in sweeping motions to push dirt into piles to be swept away.	Keep body balanced while bending down, crouching, and rising to sweep up debris.	Move in a side-to-side pattern to reach different areas.	take out the necessary cleaning tools.	move over the floor with a scrubber or broom.	mop up any remaining liquid.	sweep or mop the floor.
cleaning gutters	Move side to side and up and down to survey gutters.	Reach up and grasp the gutters to secure them while performing the task.	Bend forward while working on the gutters.	Move around the ladder as needed to access different areas of the gutters.	climb the ladder to reach the gutters.	scoop out debris and debris with cleaning tools.	flush out the gutters with water.	be cleaning gutters.
cleaning pool	Tilt side to side to survey area.	Reach out to grab and move items.	Move about the pool to get to different areas.	Walk around the pool floor.	remove debris and leaves from the surface of the pool.	scrub and vacuum the walls and floor of the pool.	check and adjust chemical levels of the pool.	be scrubbing and sweeping the pool surface.
cleaning shoes	Move from side to side observing the shoes.	Move together to wipe the dirt off the shoes.	Bend over to get a better view of the shoes.	Remain stationary while the upper body moves.	apply a cleaning solution to the shoe.	buff the shoe with a rag or special brush.	finish by polishing the shoe with a cloth.	wipe the dirt off the shoes with a cloth.
cleaning toilet	Move from side to side while scrubbing the toilet bowl.	Move in circles to scrub surfaces in the toilet, apply cleaner and wipe away excess water.	Bend at the waist to access different parts of the toilet.	Remain stationary, alternating weight to maintain balance.	gather supplies.	scrub and disinfect the toilet.	rinse and dry the toilet.	be scrubbing the toilet.
cleaning windows	Tilting side-to-side to look through the window.	Reaching up to wipe the window with rags or sponges.	Leaning forward slightly to reach any higher parts of the window.	Supporting the torso and body while reaching and standing.	gather the necessary window-cleaning materials.	apply the cleaning solution and polish the windows.	dry the windows and put away the cleaning supplies.	be wiping windows.
climbing a rope	Move from side-to-side in order to keep balance.	Grip the rope and pull the body up.	Bend upward as the legs are alternately pulled up the rope.	Alternate between pulling up and pushing off the rope to move higher.	grasp the rope.	pull themselves up the rope.	release their grip and lower themselves from the rope.	ascend the rope hand over hand.
climbing ladder	Move side to side for balance.	Grip and release the ladder rungs.	Twist from side to side for balance.	Step up to the next highest rung.	place one foot on a rung of the ladder.	then lift and place the other foot on the next rung.	then repeat this process until reaching their desired height.	ascend the ladder.
climbing tree	Turn and tilt to help guide direction.	Reach, grip, and pull around branches.	Twist and maneuver to adjust center of gravity.	Push and lean against the trunk and limbs for support.	reach out for a sturdy branch.	pull themselves up onto the branch.	climb higher up the tree.	ascend the tree.
contact juggling	Remain relatively still and balanced.	Move in a controllable, circular motion, passing and manipulating the balls around each other.	Remain relatively still, though subtle shifts may be necessary to keep balance.	Remain relatively still and grounded, though minor shifts may be necessary to keep balance.	manipulate a sphere by rolling it around their hands and arms.	position their arms to transition the ball between them.	smoothly roll the sphere by using friction.	manipulate and roll one or more objects rhythmically with their hands.
cooking chicken	Move up and down to look into the pot when stirring or adding ingredients.	Move quickly and precisely to chop, mix, stir and ladle ingredients.	Bend over to view ingredients in the pot and to reach for tools or ingredients.	Remain stationary while standing at the stove.	prepare ingredients.	cook the chicken.	plate the chicken.	be stirring, sautéing, and baking the chicken.
cooking egg	tilt slightly to view the egg in the pan.	grasp the handle of the pan and lift and turn it as necessary.	bend down toward the pan and twist slightly as hands move it.	remain in one place to provide stability as torso and arms move.	heat a skillet.	crack an egg and add it to the skillet.	scramble the egg until cooked.	be cooking eggs.
cooking on campfire	Move in a circular motion around the campfire.	Move quickly to place and rearrange food on the fire.	Bend forward when reaching for cooking utensils or food.	Stay stable and steady while crouching or sitting next to the fire.	gather wood and kindling.	build a fire and cook food over the flames.	clean up the campfire area after they have finished.	be stirring the fire and carefully placing ingredients over the logs.
cooking sausages	Move from side to side, and up and down, to monitor the cooking progress.	Manipulate the sausages in the cooking area using kitchen tools such as tongs or a spatula.	Lean forward and back to observe the cooking process.	Remain stationary or move around the kitchen to gather any necessary cooking ingredients.	heat up the pan.	cook the sausages.	plate the cooked sausages.	be flipping sausages in a pan.
counting money	Tilts slightly forward.	Clutch and grasp money tightly.	Remain stable and upright.	Remain stationary in a seated position.	pick up a bill.	examine it and confirm the denomination.	place it in a pile of money.	count the money.
country line dancing	Move from side to side in time with the music.	Move in coordination with the feet, twirling and tapping in time with the beat.	Twist and turn to help keep balance on the slippery dance floor.	Move quickly back and forth to create steps and turns in predetermined patterns.	take a partner's hands and form a line.	move their feet together in step with the beat of the music.	enjoy the experience of performing the dance with others in the line.	move their feet and body in time to the music, taking steps to one side, and then the other in synchronization with their partner and the rest of the group.
cracking neck	rotate from one side to the other.	rest lightly on the back of the head as it rotates.	remain stationary, with hands supporting the head as it rotates.	remain stationary and unobstructed.	tilt their head.	tilt it further and crack their neck.	rest in a relaxed position.	rotate their head from side to side to make a cracking sound.
crawling baby	Move from side to side while keeping steady on the ground.	Alternately push against the ground, allowing the baby to pull their body forward.	Contort and twist slightly as the legs and arms move.	Alternately push against the ground to propel the torso forward.	lower themselves onto their hands and knees.	pull their body forward with their arm and leg muscles.	repeat the motion, alternating arms and legs.	crawl like a baby.
crossing river	Move from side-to-side to keep balance as the body moves between the waves.	Reach and pull the body forward in the water.	Twist and pivot to maintain alignment while moving through the waves.	Push against the water to propel the body forward.	enter the river.	swim across the river.	exit the river.	cross the river.
crying	tilt down, droop forward, and move in small, rhythmical shakes.	cover face, grip onto clothing, and make small, pulling motions.	heave and convulse, arching backward.	remain relatively still, although some may move to release tension.	draw in a deep breath.	let out a loud sob.	exhale in anguish.	sob and weep.
curling hair	Tilt slightly back.	Hold the hair curler to the desired section of hair.	Remain still.	Remain still.	wrap a curl of hair around a heated curling iron.	hold the curl in place for a few seconds.	release the curl and repeat the motion with the next curl.	curl their hair inwards.
cutting nails	Remain fairly still, turning slightly to the side for a better view.	be used to hold the nail clippers and to manipulate the nail.	Bend forward slightly to bring the hands close to the nails.	Remain stationary and steady.	pick up the clippers.	trim the nails.	discard the trimmings.	be cutting their nails.
cutting pineapple	Turn side to side.	Grip and hold the pineapple while a knife cuts into it.	Tilt slightly in and out to maintain balance.	Remain stable on the floor to provide balance.	hold the pineapple.	slice the pineapple.	remove the slices.	cut the pineapple with a knife.
cutting watermelon	Twist to one side to cut into the melon.	Hold the melon in place while using a knife to cut along the center.	Lean forward and rotate slightly to help give enough force for the cut.	Remain relatively stationary to provide balance and stability for the cut.	grab a knife.	cut the watermelon.	scoop out the pieces.	slice the watermelon with a knife.
dancing ballet	Nod slightly and move gracefully like a swan.	Move in a curved shape through the air, often with fingers splayed out.	Curve and bend gracefully, with the back and shoulders moving together.	Move in quick, graceful movements, with feet pointed and toes often flexed.	rise up onto their toes.	make slight jumps as they move gracefully through the air.	close the routine with a graceful finish.	move gracefully and efficiently in time to the music.
dancing charleston	Move in time to the beat, from side-to-side and up and down.	Alternate in waiving, tapping and clapping in time with the music.	Move side to side and up and down.	Performing a four-step movement with a kick and in sync with the music.	kick backward with the right foot.	repeat the kick with the left foot.	kick forward with both feet simultaneously.	rapidly swing and kick their legs in an exaggerated manner.
dancing gangnam style	Move from side to side with a slight bobbing motion.	Bounce up and down in sync with the music while making exaggerated gestures.	Move in a line-dancing style fashion, swaying from side to side while on beat.	Take turns kicking with the knees bent in a horseriding motion.	start by galloping in place.	then begin to swing their arms in a whip-like motion.	finish by swaying side to side, while kicking out their legs.	move their feet in a distinct pattern, while performing arm motions and shifts in hip position.
dancing macarena	Make a counter-clockwise circle from side to side.	Alternate making a "V" shape and extending out.	Move back and forth to the rhythm of the song.	Bend and straighten with a simple side steppping motion.	step to the right with their left foot.	put their hands up over their head.	bring their left foot back and repeat.	sway side to side and clap their hands above their head.
deadlifting	Raise to look forward.	Grip the bar tightly.	Bend forward and remain close to the bar.	Drive up to return to a standing position.	bend at the knees and grip the bar.	drive with their legs to lift the weight off the ground.	extend their hips and knees to reach a standing position.	lift a weighted barbell from the ground to an upright position.
decorating the christmas tree	Tilt to reach higher branches.	Place ornaments onto the branches.	Bend to pick up ornaments, move around the tree.	Stabilize the trunk while reaching up.	gather the decorations.	hang the decorations.	step back to admire the tree.	hang ornaments and lights on the tree.
digging	Move slightly up and down while digging.	Move in a scooping and pushing motion.	Move up and down to generate momentum for the hands.	Push off the ground and provide stability while crouching and digging.	take up a shovel and start to dig.	move the dirt and make a hole.	fill the hole up again once they have finished.	be digging vigorously.
dining	Turn and tilt to the side to take a bite.	Lift the fork, spoon, or glass, and bring food, drink, and utensils to the mouth.	Lean into the table slightly.	Remain still, balanced in a comfortable seated position.	enter the restaurant.	place an order.	eat their meal.	be eating.
disc golfing	Rotate to follow the flight of the disc.	Throw the disc.	Rotate to follow the flight of the disc.	Provide the momentum for the throwing motion.	throw the disc.	watch the disc as it flies.	pick up the disc once it has landed.	throw a disc from a tee-off point, aiming for a basket.
diving cliff	Point downward at a steep angle.	Reach out and move forward to help propel the diver through the air.	Tuck forward and be level with the legs.	Extend and kick outward to help stretch and keep the body straight.	prepare to dive off the cliff.	jump off from the cliff.	plunge into the water below.	plunge downward from a high cliff into the water below.
dodgeball	quickly duck and move away from oncoming throws.	throw and catch balls, dodge throws, and help the feet and legs keep balanced.	twist and turn to avoid incoming throws.	run and jump to dodge incoming throws and catch balls.	bend their knees and crouch.	leap to the side.	throw themselves into a roll.	quickly move their body to avoid the ball being thrown at them.
doing aerobics	Move from side to side with the music.	Swing back and forth and clap in time with the beat.	Twist and bend to the rhythm of the music.	Lash out with kicks, jumps, and lunges.	warm up before the exercise.	do aerobic exercises such as running or jumping jacks.	cool down and stretch afterwards.	be vigorously jumping, kicking, and stretching their legs, arms, and torso.
doing laundry	Move from side to side to check clothes for stains and other markings.	Fold and carry clothes to and from the laundry basket and washing machine.	Twist and reach to transfer loads of laundry from the washing machine to the dryer.	Move back and forth to and from the laundry room.	sort clothing into white and color piles.	fill the washer with clothes and detergent.	transfer the clothes to the dryer and remove them when they are done.	fold clothes, wash clothes, and hang them up to dry.
doing nails	Move side-to-side and up and down while focusing on the nail.	Grip the nail file and begin shaping and buffing the nail.	Bend down towards the nail to see the exact shape while filing.	Remain stationary and served as a base to maintain balance.	prepare the nails.	apply polish or other treatments.	finish with a top coat.	be vigorously filing and buffing nails.
drawing	tilt to various angles to imply perspective and proportion.	move the pencil or other drawing utensil in a controlled manner.	twist and turn to allow arms and shoulders to obtain proper angles needed for drawing.	typically stay still to provide a stable base for drawing.	pick up a pencil.	draw a figure with the pencil.	set the pencil down.	draw slow, deliberate strokes.
dribbling basketball	bob slightly to maintain balance.	swiftly move the ball in a bouncing motion.	pivot from side to side.	slowly move back and forth, creating momentum.	pick up the basketball.	bounce the ball and control it with their hands.	move down the court, advancing the ball with each dribble.	bounce the basketball and move it across the court with quick, coordinated steps.
drinking	tilt backwards slightly.	bring the cup or glass of beverage up to the mouth.	lean forward slightly.	remain largely stationary.	pick up a cup or glass.	raise the cup to their lips and take a sip.	lower the cup and swallow the drink.	raise a cup to their lips and tilt it back, swallowing the liquid inside.
drinking beer	Tilt back slightly.	Grip the glass and bring it to the mouth.	Lean forward slightly.	Remain stationary.	raise the beer to their lips.	tilt the beer bottle and drink the beer.	swallow the beer.	be drinking beer.
drinking shots	tilt backwards slightly.	grab the shot glass.	lean forward slightly.	remain stationary.	pick up a shot glass.	pour a shot of liquor.	down the shot in a single gulp.	be taking shots rapidly.
driving car	Turn to look in different directions.	Grip the steering wheel and control the pedals.	Remain in a comfortable and relaxed position.	Support the weight of the upper body and rest on the pedals.	turn on the ignition.	press the accelerator to move the vehicle forward.	steer the car by turning the steering wheel.	be driving the car.
driving tractor	Move slightly at times to make sure tractor is going in the right direction.	Be firmly on the steering wheel in order to control the direction the tractor is going.	Remain mostly upright, adjusting to the bumps in the field.	Remain stationary as the pedals are not needed to drive the tractor.	start the tractor engine.	guide the tractor with the wheel.	turn off the tractor engine.	be driving a tractor.
drop kicking	Pivot slightly in preparation for the kick.	Extend outwards for balance, or to the side just before contact with the ball.	Twist and pivot to generate the power for the kick.	Straighten to generate force, with the kicking leg making contact with the ball.	raise their leg up.	swing their leg outwards with force.	extend their leg forward and downward to connect with the ball or object.	swing their leg up and then kick forwards with their foot.
drumming fingers	Remain slightly tilted up and facing forward.	Quickly tap and bounce on a surface with fingers.	Rock back and forth to the rhythm of the drumming.	Remain stationary with feet placed firmly on the ground.	raise their fingers off the surface.	then tap their bent fingers against the surface.	straighten their fingers and repeat.	tap their fingers rapidly on a surface.
dunking basketball	Lean slightly forward.	Push the ball toward the hoop.	Extend up toward the hoop.	Generate the power for the dunk by pushing off the ground.	take a running start.	jump and reach for the rim.	slam the ball through the hoop.	rapidly jump up, thrusting their arm and hand forward to throw the ball into the hoop.
dying hair	bob and weave from side to side.	section the hair and comb it up or down.	twist from side to side while the hands comb through the hair.	remain stable in order to remain balanced while styling the hair.	prepare the hair for dyeing.	apply the hair dye.	rinse and style the hair.	dye their hair.
eating burger	Tilt to bring the burger closer to the mouth.	Grasp the burger to bring it to the mouth.	Lean forward slightly to bring the burger closer to the mouth.	Remain stationary for balance.	pick up the burger.	take a bite of the burger.	chew and swallow the burger.	be chewing and swallowing a burger.
eating cake	Tilts forward slightly.	Grasp the cake, bringing it to the mouth.	Lean slightly towards the cake.	Remain still or make small movements to maintain balance.	select a piece of cake.	cut the cake.	them eat the cake.	be eating cake.
eating carrots	Move forward and back as chewing occurs.	Hold the carrot and move back and forth from mouth.	Remain still with a slight upward and backward tilt to allow for easier chewing.	Remain still to provide stability while eating.	pick up the carrot.	bite into the carrot.	chew and swallow the carrot.	be munching on carrots.
eating chips	Tilts forward slightly.	Reach out to grasp the chips.	Bend forward slightly.	Remain stationary.	pick up the chips.	consume the chips.	place the empty chips bag aside.	be chomping on chips.
eating doughnuts	Tilts down to take a bite of the doughnut.	Reach out to pick up the doughnut, and then guide it to the mouth.	Lean forward and arch back as the upper body moves to take a bite.	Remain stationary as the upper body moves.	pick up the doughnut.	take a bite.	chew and swallow.	be biting into doughnuts.
eating hotdog	tilt towards the hotdog to take a bite.	pick up and hold the hotdog.	lean in slightly to reach the hotdog.	remain mostly stationary, balancing the body.	pick up the hotdog.	take a bite of the hotdog.	swallow the hotdog.	be chewing and swallowing the hotdog.
eating ice cream	Raise slightly to bring ice cream to mouth.	Grip the ice cream container or spoon.	Lean forward slightly to bring the ice cream closer.	Remain stationary.	pick up a spoon.	scoop ice cream into the spoon.	eat the ice cream.	be eating ice cream.
eating spaghetti	Move from side to side as chewing begins.	Grip the fork and twist it to bring spaghetti onto the plate.	Bend slightly forward to bring the plate closer.	Remain still as the eating takes place.	take a forkful of spaghetti.	twirl the pasta around the fork.	lift the fork to their mouth and eat it.	be twirling strands of spaghetti with a fork and lifting them to their mouth.
eating watermelon	Lift, tilt and move side to side to bring watermelon to mouth.	Grip watermelon, cut into pieces, bring pieces to mouth.	Lean forward, twist to reach watermelon.	Remain steady to provide a stable base of support.	pick up a slice of watermelon.	take a bite of the watermelon.	swallow the bite of watermelon.	be biting into and chewing a piece of watermelon.
egg hunting	Scan the area, looking for eggs.	Pick up the eggs.	Twist and turn to reach and grab eggs.	Walk through the area to find more eggs.	search for eggs.	pick up the eggs.	store the eggs in a basket.	search for and collect eggs.
exercising arm	Remain stationary	Move in circles or alternate vertical movements	Remain stationary	Remain stationary	bring their arm back.	thrust their arm forward.	bring their arm back to the starting position.	move their arms in a repetitive motion.
exercising with an exercise ball	Twist and turn to maintain balance.	Clasp the exercise ball, or move out to the sides for balance.	Move with the ball, fluctuating in tension and intensity.	Squat or stand while rolling the ball with the feet.	inflate the exercise ball.	perform various exercises with the ball.	deflate the exercise ball.	be bouncing and pushing the ball while performing exercises.
extinguishing fire	Move back and forth to direct the hose.	Pull on the hose and manipulate the nozzle.	Twist to direct the hose at the fire.	Support the weight of the hose and move to direct the nozzle.	approach the fire.	douse the fire with water or a fire extinguisher.	check to ensure the fire is extinguished.	extinguish the fire.
faceplanting	hit the ground first.	be stretched out to break the fall.	follow the head downward.	be bent in a crouched position to absorb the impact.	extend the arms and legs outward.	then make contact with the ground.	cause the person to slide forward.	fall face-first into the ground.
feeding birds	Move side to side to observe the birds.	Place the bird feed in the open hand to be eaten.	Bend slightly forward to put food in range of the birds.	Remain still to maintain balance.	lift up a container of birdseed.	open the container and scatter the seed.	observe the birds gathering and eating the seed.	be seen throwing grain or food to the birds.
feeding fish	Dip forward to reach the bowl of fish.	Grip the bowl and scoop fish out.	Lean forward to lower hands into the bowl.	Remain stationary on the ground.	take out the feed.	scatter the feed into the water.	observe the fish eating the feed.	be scooping food into the water.
feeding goats	Turn and nod in direction of the goat.	Reach out to offer food and pet the goat.	Bend forward to bring food closer to the goat.	Step back to keep balance while leaning forward.	approach the goats.	feed the goats.	leave the goats.	be feeding goats.
filling eyebrows	Slightly tilt to one side in order to make easier viewing of the face.	Gently use small strokes with a pencil to fill the eyebrows.	Remain still, as most of the movement comes from the hands.	Remain still, with only slight repositioning depending on the angle of the face.	shape the brow with a pencil.	then brush the brow hairs into place.	refine and define the shape by filling in with an eyebrow product.	draw short, upward strokes with an eyebrow pencil.
finger snapping	Remain stationary.	Quickly clap together with the fingers extended outward.	Remain relatively still, with a slight rotation of the shoulders to assist in the motion.	Remain still with no involvement.	bring their fingers together.	clap their fingers together quickly.	release their fingers.	snap their fingers.
fixing hair	Tilt backwards and forwards to get a better view in the mirror.	Comb or brush the hair, as well as separate sections to create different styles.	Lean forward and to the side to get the best angles for styling.	Stand in place to maintain balance and support the torso.	lift their hand to their hair.	adjust strands of hair.	smooth out their hair.	be fixing their hair.
flipping pancake	Whip back and forth.	Quickly swipe down at the pancake.	Lean back and forth to add torque to the flipping motion.	Remain mostly stationary for balance.	grab the pancake with a spatula.	quickly flip the pancake over.	slide the pancake onto the plate.	flip the pancake in the air.
flying kite	Move from side to side to control the movements of the kite.	Pull and release the kite string to control the kite's altitude and direction.	Move from side to side to help coordinate the movement of the hands.	Balance the body while moving the torso and head.	hold the kite steady.	release the kite string.	guide the kite in the air.	be lofting a kite into the air.
folding clothes	tilt forward slightly.	reach to pick up folded clothes and put away.	bend slightly to aid the hands in reaching items.	remain still to provide balance for the body.	pick up a piece of clothing.	fold the clothing.	place the folded clothing aside.	be folding clothes.
folding napkins	Remain still.	Reach for a napkin, fold in half, and set it aside.	Hinge forward slightly and rotate side to side to reach for multiple napkins.	Remain still.	grab a napkin.	fold the napkin.	set the napkin down.	be folding napkins.
folding paper	Tilts downward to view the paper.	Move to pick up the paper and fold it in half.	Move close to the paper to allow heightened precision when folding.	Remain stationary.	unfold the piece of paper.	crease the paper into a fold.	flatten the paper in the fold.	fold paper.
front raises	remain stationary.	raise up from the sides of the body to shoulder level.	remain stationary.	remain stationary.	bring their arms up in front of them.	hold them there with straight elbows.	then lower their arms back to their original position.	lift their arms in front of them with straight elbows.
frying vegetables	Tilt downwards to observe the vegetables frying in the pan.	Steadily move the pan over the heat source while stirring the vegetables	Bend slightly downwards to make it easier to stir the vegetables in the pan	Remain stationary while standing in place to allow for easier control over the pan.	heat oil in the pan.	add the vegetables.	flip the vegetables and fry until cooked.	be stirring and flipping the vegetables in a pan over heat.
garbage collecting	Move from side to side, scanning the area for garbage.	Reach out to pick up and hold the garbage.	Remain upright, supporting the arms and head while bending occasionally to reach garbage on the ground.	Step forward and backward to move around the area while garbage collecting.	pick up garbage.	sort through garbage.	dispose of garbage.	pick up garbage and put it into a bag or container.
gargling	tilt back slightly.	hold cup of liquid in front of the mouth.	remain upright and still.	remain relatively still, with only slight changes in posture.	tilt their head back.	hold water in the mouth and swish it around vigorously.	then spit out the water.	move their mouth in a circular motion while making a liquid sound.
getting a haircut	Move slowly as the barber cuts around it.	Remain still and relaxed as the barber works the scissors.	Remain upright and steady in the chair.	Remain motionless and still, typically crossed at the ankles.	sit in a stylist chair.	have their hair cut and styled.	pay for their service and leave.	have their hair cut.
getting a tattoo	Remain still and in a neutral position.	Remain still and in a comfortable position.	Remain still and in a comfortable position.	Remain still and in a comfortable position.	pick a design.	get the tattoo applied to their skin.	take care of the tattoo as it heals.	sit down for a tattoo.
giving or receiving award	Slightly tilt in acknowledgement.	Clasp together in a thanking gesture.	Lean forward to accept the award.	Remain still but with feet in an alert stance.	step onto the stage.	accept or present the award.	thank the audience.	smile and accept or present an award.
golf chipping	remain steady with slight neck tilt.	grip the club, turn back on backswing, and maintain light grip while pushing forward.	twist to the left on the backswing and back to the right on the follow-through.	remain stationary, with slight bend in the knees.	take their stance.	swing and send the ball in the air.	follow through to complete the chip.	swing club upwards, striking ball with an arching motion towards the target.
golf driving	Turn to keep eyes on the ball.	Pull the club back and then snap forward to hit the ball.	Rotate in the backswing and then turn right and left in the follow-through.	Remain stable and provide balance throughout the swing, but flexing slightly in the follow-through.	take a club to hit the ball.	swing to hit the ball.	follow through with the swing.	swing their driver and hit the ball.
golf putting	Stay stationary and direct the arms and hands.	Push the club through the ball with a slight rotation of the wrist.	Rotate lightly from the waist in order to follow through with the swing.	Remain still while standing on the balls of the feet.	address the ball.	take their back swing.	follow through with their putt.	swing the club back, then forward, and hit the ball towards the hole.
grinding meat	Move back and forth in a circular motion.	Push and pull the grinder's handle.	Remain stationary for stability.	Remain stationary for balance.	place the meat in the grinder.	turn the grinder handle to grind the meat.	remove the ground meat from the grinder.	repeatedly move the meat over a grinder.
grooming dog	Move from side to side and up and down to check the dog's fur for mats.	Run through the dog's fur to loosen mats and brush the fur.	Bend and lean forward to reach all parts of the dog's body.	Remain planted to provide a stable stance.	prepare the grooming area.	brush the dog and trim its fur.	clean up and put away supplies.	brush and care for the dog.
grooming horse	Move side-to-side to brush against the horse's coat.	Make circular motions to rub and massage the horse's coat.	Lean in to access hard-to-reach areas.	Balance the upper body as the grooming is done.	brush the horse's coat.	check the horse's hooves for stones.	clean the horse's saddle and bridle.	brush and care for the horse.
gymnastics tumbling	Remain still and slightly arched during tumbling.	Reach overhead into an extended position during tumbles, as well as be used for balance.	Maintain a tight, compact position, as well as rotate and twist.	Provide propulsion, with straight legs used for leaping, and bent legs used for somersaults and twists.	complete a series of roll, somersaults and handsprings.	move down the floor with linking dynamic skills using this momentum.	finish with a gymnastic skill such as a twist or a flip.	execute an aerial sequence of acrobatic moves, flipping and rotating in the air.
hammer throw	Rotate sharply while pivoting to generate force.	Release the hammer in an upward and outward motion.	Rotate quickly while keeping the hips and shoulders aligned.	Assist the upper body in the rotation to generate power.	rotate their body in a few consecutive circles.	launch the hammer with full force.	watch as the hammer flies away.	spin in a circular motion, whipping the hammer behind them and releasing it at the highest point of the throw.
headbanging	Quickly jerk forward and backwards in a repetitive rhythm.	Move in the same rhythm as the head, often clapping or raising up in excitement.	Move side to side while the hands and head bob rhythmically.	Move slowly up and down with the momentum of the headbanging.	tilt their head back.	move their head quickly forward and backward.	repeat the motion.	rapidly move their head up and down in time with the music.
headbutting	Thrust forward aggressively.	Remain at the sides.	Lean forward and move towards the target.	Extend and move forward to add power and momentum to the movement.	draw back their head.	thrust it forward.	make contact with the other person's head.	rapidly thrust their head forward.
high jump	Lift upwards as part of a powerful jump.	Extend upwards to help lift the body off the ground.	Move forward and upwards to create the necessary momentum.	Drive up powerfully from the ground to propel the body upwards.	crouch down with arms behind their head, ready to jump.	push off with their legs and reach up with their arms.	arch their back as they reach the peak of their jump.	jump upwards explosively, raising their body above a raised bar before landing on the ground.
high kick	Tilt back slightly, keeping the chin tucked in.	Raise arms up above the head, keeping them straight and palms facing inward.	Rotate backward, arching the spine up and leaning back.	Extend the leg up towards the sky at a 90-degree angle.	raise their leg up.	extend their leg outward.	quickly retract their leg.	quickly lift their leg up and kick high.
hitting baseball	Move quickly backwards while turning to face the ball.	Swing the bat quickly and forcefully.	Rotate in order to generate momentum for the swing.	Plant firmly to provide stability and balance.	take a swing.	make contact with the ball.	follow through with their swing.	swing their bat and make contact with the baseball.
hockey stop	Follow the momentum of the skater, bending slightly forward.	Reach out to the sides in a braking motion.	Turn slightly in the direction of the stop, with the hips following.	Bend in a perpendicular line to the ground with the skates planted on the ice.	bend their knees and shift their weight to the back skate.	then transfer their weight onto their toes and pull their back skate into a sharp turn.	lean forwards and bring their back skate to a complete stop.	quickly slide their feet wide apart, bringing them to a sudden halt.
holding snake	Remain still to steady the snake in a secure grip.	Wrap around the snake at the midsection to maintain a steady hold.	Stay upright to support the weight of the snake in the hands.	Remain still and strongly rooted on the ground for additional support.	grip the snake firmly.	secure the snake around the body.	continue to support the snake's body.	be holding the snake.
hopscotch	Twist side to side to turn and face the square.	Reach to pick up the stone and land in the square.	Bend down to low squat while jumping to the square.	Jump forward and backward to land in the squares.	hop on one foot.	jump from square to square.	repeat the sequence.	hop on one foot to a marked square, jump back to the starting point, then hop on alternate feet to the next marked square.
hoverboarding	Remain stationary and pointed forward.	Grip the handles firmly and remain stationary while balancing.	Move from side to side as needed for balance.	Move in an up-and-down motion to propel the hoverboard forward.	mount the hoverboard.	then ride the hoverboard.	dismount the hoverboard.	glide over the surface on a hoverboard.
hugging	lean forward and incline slightly towards the other person.	extend and embrace the other person in a gentle embrace.	move forward and press against the other person.	remain stable and maintain a close base.	extend their arms.	draw close and embrace.	release the hug.	embrace another person with open arms.
hula hooping	Move side to side and up and down.	Steadily move the hoop around the waist in a circular motion.	Twist from side to side and sway with the hoop motion.	Remain stationary, although some leg motions may be added for rhythm.	start twirling the hoop around their waist.	move their hips to keep the hoop in motion.	gradually increase the speed of motion.	rotate their hips in a circular motion while spinning a hula hoop around them.
hurdling	rotate slightly to each side to observe the obstacle.	provide balance and lift, as the upper body moves forward.	shift forward and lift as the legs extend and lift off the ground.	bend and drive hard off the ground to thrust the body over the obstacle.	crouch down to prepare for the jump.	propel their body forward over the obstacle.	land on the other side.	jump over an obstacle with their legs extended in front and back of their body.
hurling (sport)	Turn from side-to-side quickly to follow the motion of the Hurley.	Grip the Hurley and propel it forward in a sweeping motion to hit the sliotar.	Twist and bend as the arms swing forward in a strong power motion.	Provide balance and stability while the arms and torso propel the Hurley.	set-up their throwing stance and grip the hurl.	swing the hurl forward and release it with full force.	follow through on their release and watch the hurl fly towards its target.	quickly wind up and throw the ball with great force.
ice climbing	Turn and tilt up and down to view the terrain.	Grab onto rocky outcroppings and pull up body.	Use hips to drive forwards and backwards as well as twist and turn for different movements.	Keep legs strong to help propel the climber up the ice wall.	fasten their harness securely.	climb up the frozen face of the mountain.	rappel or be lowered back down.	ascend an icy surface by using specialised tools and techniques.
ice fishing	Move from side to side while looking for a spot to fish.	Grip an ice fishing rod to cast out a lure and to feel for a bite.	Lean forward to focus attention on the spot being fished.	Position the body so that it remains steady and balanced on the ice or snow.	prepare their line and bait.	cast the line and wait for a bite.	pull up the catch.	cast a fishing line onto the frozen lake.
ice skating	Remain upright and facing forward.	Alternately glide and swing to create momentum.	Move from side to side, while keeping hips in line with skates.	Push off and glide in alternating directions.	push off with their skates.	glide across the ice.	turn and repeat the motion.	glide gracefully across the ice.
ironing	Move side to side slightly and remain steady.	Move back and forth pressing and smoothing the clothing.	Move slightly from side to side and remain upright.	Remain slightly bent and stationary.	hold the iron up to the clothing.	press the iron onto the clothing.	move the iron across the clothing.	be pressing clothes with an iron.
javelin throw	Co-ordinate and direct the power generated from the hands and lower body.	Whip the javelin forward with a sudden, powerful movement.	Rotate and snap around the central axis, utilising the power generated by the lower body.	Generate a powerful forward drive, propelling the javelin forward.	take a running start and plant their feet.	then push off with their feet and throw the javelin.	then follow through with their throw and release the javelin.	thrust a javelin forward with an arm and shoulder motion.
jetskiing	Move in a nodding motion.	Clutch the handlebars firmly and move back and forth with the waves.	Follow the movement of the hands and rock in sync with the waves.	Remain straight and planted firmly on the jetski for balance and control.	start the engine.	drive the jetski.	turn off the engine.	be jet skiing.
jogging	move side-to-side in an alternating rhythm.	swing back and forth in a steady, symmetrical motion.	rock from side-to-side with an up-and-down motion.	move rhythmically as the feet alternately lift off and strike the ground.	extend their legs.	swing their arms.	pick up their feet.	be jogging.
juggling balls	Track the progress of the balls in the air.	Move quickly in an alternating sequence to toss the balls up.	Remain stationary to provide a stable base for the arms and hands.	Remain stationary or shift slightly in order to properly balance the body.	throw a ball in the air.	catch the ball before it falls.	repeat the process with the other balls.	be throwing and catching multiple balls in the air.
juggling fire	Remain stationary and focused on the juggling pattern.	Quickly move up and down in an alternating pattern.	Remain upright and still to maintain balance and focus.	Stay bent slightly and prepare for quick movements if needed.	throw a fireball into the air.	catch the fireball with their hands.	then throw the fireball back up into the air.	toss multiple flaming objects into the air and catch them before they fall.
juggling soccer ball	Quickly tilt and turn to keep ball in sight.	Move to catch and throw the ball with precision and accuracy.	Move in different directions to maintain balance.	Position and move rapidly to adjust body to reach the ball with the feet.	throw the soccer ball into the air.	kick or head the ball before it hits the ground.	catch the ball before it touches the ground.	toss and catch a soccer ball in the air.
jumping into pool	arch back slightly.	push off the ground with force to launch body into air.	bend at the waist and contract the torso muscles to emphasize jump.	bend at the knees and propel the body forward into air.	bend their knees.	thrust their arms and legs outward.	propel themselves into the pool.	jump into the pool.
jumpstyle dancing	Bounce up and down quickly.	Move energetically with exaggerated arm movements.	Move from side to side with a bouncing motion.	Move up and down quickly with a combination of spins and stomps.	jump up into the air.	land in a squatting position with legs shoulder-width apart.	alternate jumping and squatting to the beat.	rapidly alternate between leaping and hopping while performing energetic dance moves.
kicking field goal	Turn slightly to the side.	Grip the ball tightly.	Lean back slightly.	Extend and powerfully kick the ball forward.	approach the ball.	initiate their kicking motion.	follow-through with their kick.	kick the ball through the uprights.
kicking soccer ball	lift slightly to maintain balance.	extend to propel the ball with foot.	twist and rotate to increase power and reach.	extend to strike the ball.	raise their leg.	swing their foot forward.	make contact with the ball.	kick a soccer ball.
kissing	Tilts inwards towards the other person.	Reach up to touch the other's face or arms.	Lean in closer towards the other.	Remain relatively still, although may walk or shuffle closer.	lean in.	press their lips together.	move away.	move their lips together and embrace with their arms.
kitesurfing	Turn side-to-side with the changes in wind direction.	Pull in and out of the kite's controls, to change the kite's position in the air.	Move up and down in order to adjust weight distribution on the board.	Stand and flex to maintain balance while on the board.	stand on a kiteboard with one foot strapped in.	launch the kite into the air and fly it to gain speed.	steer the board to ride the waves or the wind.	fly across the water on a kiteboard, propelled by the wind.
knitting	Move side to side slightly and up and down to maintain tension on the yarn.	Move in alternating motions	Twist and lean forward slightly in order to gain momentum and rhythm.	Remain relatively still, providing stability.	cast on the stitches.	knit the pattern.	cast off the stitches.	be looping yarn on needles, repeating the process in a rhythmic motion.
krumping	jerk sharply, often bouncing and rolling forward.	move erratically, jutting out and in, and making sharp angles.	twist and turn aggressively, and the stomach may clench hard for focus.	move rapidly in a stomping, shuffling, or kicking motion.	tense up their body.	perform quick, jerky movements.	emphasize facial expressions to go along with the movements.	jerk and vibrate their body in rapid, staccato movements.
laughing	Shake up and down.	Clap together or swing outward.	Bend forward slightly.	Remain relatively still.	open their mouth wide and inhale.	expel air in short, staccato bursts.	gradually decrease the intensity of their breath until the laughter subsides.	be laughing.
laying bricks	Move from side to side to check the alignment of the bricks.	Hold the bricks and place them accurately while tamping them down with a trowel.	Lean forward and back to complete the task.	Support the body while bending and stretching to complete the task.	lay the bricks in a line.	spread mortar along the lines.	press the bricks into the mortar.	lay bricks in a repetitive motion.
long jump	Remain upright and steady.	Push off the ground to initiate the jump.	Lean forward for maximum propulsion.	Extend outward and backward to increase the lift of the jump.	run towards the take-off board.	spring into the air off one foot.	land on the other foot beyond the board.	run and then propel themselves into the air, using a powerful jump, before landing on the ground.
lunge	Move forward and stay straight.	Reach forward and stay straight.	Move forward and downward.	Bend and move one leg forward, keeping the other leg back.	lower their body, extending their arms forward.	use leg power to reach out and propel themselves forward.	land in the forward position, balanced and ready to continue.	lunge forward quickly.
making a cake	look at the recipe for guidance.	mix ingredients, pour batter, shape cake, frost cake.	lean over work surface while mixing and shaping.	support the body while reaching for ingredients and supplies.	gather the ingredients.	mix the ingredients.	bake the cake.	mix ingredients, pour the mixture into a cake tin, bake the cake, and decorate it.
making a sandwich	Turn to face counter or sandwich-making area.	Reach for ingredients such as bread, spread, and fillings.	Lean forward to facilitate reaching and bending to reach lower shelves.	Remain stationary to provide stability and balance.	gather ingredients.	assemble the sandwich.	enjoy the sandwich.	assemble ingredients and build a sandwich.
making bed	Turn side-to-side to fluff the pillows.	Pull sheets and blankets smooth and tuck in edges.	Lean and reach to adjust bedding in all corners.	Swing backward and forward to straighten the bottom of the bed.	Smooth out the sheets.	tuck in the edges.	fluff the pillows.	be smoothing out blankets, tucking in sheets, and plumping pillows.
making jewelry	Observe and plan jewelry designs.	Measure, string, attach, wrap, fasten jewelry components.	Steady hands with arm movements.	Move from one jewelry workspace to another.	choose the materials.	assemble and design the jewelry.	finish the jewelry by adding details and embellishments.	hold a pair of pliers, stringing beads onto wire to craft jewelry.
making pizza	Tilt to observe the progress of the pizza.	Stretch or knead the dough, assemble toppings, cut slices.	Rotate to access different ingredients or to enter the oven.	Move to step back to observe the pizza.	gather ingredients.	assemble the pizza.	bake the pizza.	knead dough, spread sauce, top with cheese and other ingredients, and bake.
making snowman	be tilted slightly downwards.	be raised to form the shape of a snowman.	be bent inwards slightly to give the snowman its shape.	be spread wide to form the base.	gather snow.	shape it into a snowman.	add finishing touches, such as a scarf, coal, and a hat.	form snow into a body, two arms, a hat, and a face.
making sushi	Bow slightly towards the sushi roll while preparing it.	Precisely mix the ingredients, roll the sushi and shape it.	Twist and rotate to allow better access to the ingredients.	Provide balance while performing the movements.	prepare the ingredients.	assemble the sushi.	present the sushi.	roll, cut, and shape the ingredients into sushi.
making tea	Tilt to observe the condition of the tea leaves and the water.	Reach out to grab a mug, teapot, and other necessary utensils.	Lean in to pour the water into the teapot.	Move to the kitchen counter to place the mug and other items used for making tea.	gather the tea and other ingredients.	put everything in the teapot and pour in water.	steep, stir, and then serve the tea.	boil water, steep tea leaves, add sugar and milk, and pour into a cup.
marching	Remain upright and steady.	Swing in unison with opposite feet.	Stay oriented in the same direction.	Be alternately raised and lowered in a rhythmic sequence.	lift their left leg up.	move their right leg forward.	lower their left foot to the ground.	step forward with alternate feet while swinging their arms in a regular rhythm.
massaging back	Gently knead the scalp and neck.	Move in circular or linear motions from the shoulders to the waist.	Rotate the spine with slow twists.	Apply pressure to the legs with alternating soft massage strokes.	apply pressure with their hands.	move their hands in circles.	knead into muscular knots.	be gently kneading the back in circular motions.
massaging feet	Remain still in upright orientation.	Use circular rubbing motions, applying gentle pressure with the palms and thumbs.	Remain still and maintain balance.	Remain still in seated position.	apply pressure to the foot.	move their hands in circular motions.	rub the arch of the foot.	be massaging feet.
massaging legs	move in circles.	knead, rub, and press on muscles.	twist and lean towards the leg.	move up and down along the leg.	apply pressure with their hands.	slowly move their hands in a circular motion.	apply gentle kneading pressure.	knead the legs in circular motions.
massaging person's head	Move slowly in a circular motion.	Gently knead the scalp.	Bend forward slightly.	Remain still.	place their hands on the person's head.	begin to rub the person's head in circular motions.	move their hands in a gentle kneading motion.	be gently kneading the person's scalp.
milking cow	Up-and-down, side-to-side motion	Gentle squeezing and pulling of teats	Movement against the cow's side	Stance steadied by feet planted firmly on the ground	approach the cow.	grab the udder and begin to squeeze and pull.	collect the milk into a pail.	be rhythmically squeezing and releasing their hand over the udder of the cow.
mopping floor	Move side to side to scan for dirt/debris.	Push the mop up and down across the floor.	Bend forward and backward to apply pressure to the mop.	Stabilize and propel the body when walking across the floor.	dip the mop into the water.	then wring out the mop.	move the mop back and forth over the floor.	be moving the mop in a back and forth motion.
motorcycling	Remain in an upright position and turn to coordinate with the direction of the motorcycle.	Grip the handles firmly and make small adjustments to control the steering of the motorcycle.	Lean into curves and bends to maintain balance as the motorcycle turns.	Keep feet resting on the pegs on either side of the motorcycle to maintain balance.	mount the motorbike.	start the engine and ride the motorbike.	arrive at their destination and dismount the motorbike.	be motorcycling.
moving furniture	Remain stationary and provide balance.	Grasp the furniture to lift and maneuver it.	Bend and twist to shift the weight of the furniture.	Push off the ground to lift and move the furniture.	gather the necessary tools and materials.	lift and carry the furniture to the desired location.	adjust the furniture and secure it in place.	lift and carry furniture to a new location.
mowing lawn	Move from side to side as the lawn mower is pushed.	Grip the lawn mower handle and push forward.	Bend slightly forward to help propel the lawn mower.	Push and propel the lawn mower forward.	prepare the lawn mower.	mow the lawn.	clean up the clippings.	push a lawnmower back and forth across a yard.
news anchoring	Remain facing forward, occasionally turning towards the camera.	Remain still, sometimes gesturing to emphasize a point.	Remain facing forward and upright, occasionally leaning to one side to emphasize a point.	Remain still and together.	research and prepare stories.	present stories on-air.	interact with guests and viewers.	sit in an upright position, speaking smoothly and confidently with much animation and changes in sound and pitch.
opening bottle	Tilt up slightly.	Grasp the bottle neck and twist off the cap.	Bend forward slightly.	Remain stationary.	grasp the bottle.	twist off the cap.	pour the contents.	grasp the bottle, twist the cap off, and then pull it away.
opening present	Tilting slightly forward to focus on the present.	Unwrapping the present.	Leaning in to better reach the present.	Standing firmly in place.	pick up the present.	unwrap the present.	open the present.	unwrap the present.
paragliding	Remain stationary while steering the glider.	Move to control the brakes and steering toggles.	Shift in the harness to adjust for the air currents.	Remain relatively still while being supported in the harness.	prepare the paraglider and equipment.	launch the paraglider from a high point.	fly the paraglider and land safely.	glide across the sky while suspended in a parachute-like wing.
parasailing	Remain relatively still in an upright posture.	Hold onto the harness or handles attached to the parasail.	Lean slightly forward to maintain balance.	Remain in a bent position to support the body weight.	get into a harness attached to a parachute.	be towed by a boat while the parachute catches the wind.	enjoy the view while being lifted up in the air.	be lifted up and drift through the air, suspended from a parachute attached to a boat.
parkour	React quickly to obstacles, maintaining balance and awareness.	Push off and grab objects to propel the body forward and upward.	Twist and turn to accommodate movement, while keeping the center of gravity aligned.	Jump, land, and climb with precision to move quickly and efficiently.	survey the environment.	identify and plan a route.	execute the route.	jump, climb, vault, and flip over obstacles while navigating a variety of terrains.
passing American football (in game)	Move to look for open receivers.	Throw the ball to a receiver.	Turn and twist to keep balance and throw the ball.	Run to evade defenders and move around the field.	grip the ball firmly.	throw the ball to a teammate.	follow through with their arm motion.	throw, catch, kick, or run with the football.
passing American football (not in game)	Turn slightly to track the ball.	Reach out to catch the ball.	Lean forward to catch the ball.	Move forward to gain momentum to reach the ball.	grip the ball firmly.	extend their arm and throw the ball.	follow through with their arm and release the ball.	throw the football.
peeling apples	Move slightly in a nodding motion.	Peel the apple skin off in a circular motion.	Bend slightly forward for better reach.	Remain stable and support the upper body.	wash the apples.	cut the apples into quarters.	remove the skin from the quarters.	peel the apples in a circular motion.
peeling potatoes	Tilt up and down to look at the potatoes.	Grip and peel the potatoes.	Lean forward and reach out to the potatoes.	Remain still to provide stability while peeling.	wash the potatoes.	peel the potatoes.	discard the potato peels.	grasp a potato with one hand, insert a peeler into the skin, and move the peeler around the circumference of the potato with a peeling motion.
petting animal (not cat)	Gently tilt and rub in circular motions.	Stroke and massage the fur in long, gentle strokes.	Move the body in a rocking motion.	Move slowly in a circular motion.	approach the animal.	slowly extend their hand and stroke the animal.	continue petting the animal until it is comfortable.	gently stroke the animal's fur.
petting cat	Move slowly from side to side in response to petting.	Move in a gentle, circular motion while petting.	Remain stationary, but may lean in to the petting.	Remain still and relaxed.	reach out their hand.	stroke the cat's fur.	give the cat affection.	stroke the cat's fur.
picking fruit	tilt slightly to observe the fruit.	reach out and grasp the fruit.	bend slightly forward to reach the fruit.	maintain balance while bending.	locate the fruit.	pick the fruit.	store the fruit.	reach out and pick the fruit.
planting trees	Move up and down to look for the best spot to plant the tree.	Dig a hole and hold the tree as it is planted.	Bend and twist to facilitate the planting of the tree.	Stabilize the body while the planting is being done.	prepare the soil.	plant the trees.	water and care for the trees.	dig a hole, place a tree in it, fill the soil, and water the tree.
plastering	Move from side to side to spread plaster evenly.	Move in a circular motion to spread plaster and smooth its surface.	Bend and twist to reach different areas of the wall.	Move slightly to maintain balance.	prepare the surface.	apply the plaster.	finish the plaster.	spread wet plaster onto a surface.
playing accordion	Remain stationary.	Alternately squeeze and release the bellows of the accordion while playing the keys and buttons.	Lean forward and backwards in time with the music.	Remain stationary.	assemble the accordion.	place their hands on the keys and bellows.	press the keys and move the bellows to produce sound.	squeeze, press, and push the buttons and keys of the accordion.
playing badminton	Move side to side and up and down to track the shuttlecock.	Move quickly to hit the shuttlecock.	Twist and turn to reach the shuttlecock and adjust body balance.	Move quickly to be in position to hit the shuttlecock.	gather the necessary equipment.	set up the court and net.	hit the shuttlecock back and forth over the net.	swing the racket to hit the shuttlecock over the net.
playing bagpipes	Remain stationary, while supporting the instrument.	Alternate between controlling the melody, and squeezing the bellows to provide air to the instrument.	Move slightly to allow for more air to be pushed into the instrument.	Remain stationary to provide a stable base for the musician.	assemble the bagpipes.	learn the fingering and blowing technique.	play the bagpipes.	hum while puffing their cheeks and blowing into the mouthpiece of the bagpipes.
playing basketball	Turn to follow the ball, nod in agreement with teammates.	Pass the ball to teammates, dribble, shoot, block, and rebound.	Rotate while shooting, pass the ball, and rebound.	Jump to shoot, pivot to change direction, and run across the court.	obtain a basketball.	find a court to play on.	shoot the basketball.	dribble, shoot, and pass the ball.
playing bass guitar	Nod or move slightly in time with the music.	Pluck and strum the strings of the bass guitar.	Move slightly in time with the music.	Remain still, or move subtly in time with the music.	acquire a bass guitar.	practice playing the bass guitar.	perform with the bass guitar.	strum and pluck the strings of the bass guitar.
playing cards	Remain still while focusing on the cards.	Move to pick up and hold the cards, as well as move them around the table.	Lean forward to better focus on the cards.	Remain still while seated.	gather the cards.	shuffle the cards.	deal and play the cards.	shuffle the cards, deal, lay out the cards, and play their hand.
playing cello	Move slightly to the music.	Move to pluck the strings and press the fingerboard.	Move slightly to aid in hand movements.	Remain stationary with feet flat on the floor.	select a cello.	tune the cello.	play the cello.	move their arms in a bow-like motion across the strings.
playing chess	tilt backward and forward as player analyzes the board.	move pieces around the board.	remain relatively still, though may lean in for a closer look.	remain still, though may shift in the chair for comfort.	set up the board.	make moves according to the rules of the game.	declare a winner when one player has won the game.	move chess pieces strategically on a board.
playing clarinet	Remain still, but tilt slightly to the side to better support the instrument.	Move to press down the keys and manipulate the mouthpiece.	Remain relatively still, but tilt slightly forward to better support the instrument.	Remain still to provide stability while playing.	assemble the clarinet.	practice playing the clarinet.	perform with the clarinet.	blow into the mouthpiece and move their fingers across the keys.
playing controller	Remain relatively still, although the head may move slightly when pressing buttons or making other inputs.	Move rapidly to press buttons and operate the controller.	Remain mostly stationary, although it may move slightly when making inputs.	Remain completely still.	pick up the controller.	press the buttons and move the joystick.	observe the results on the screen.	push buttons, move joysticks, and manipulate the controller.
playing cricket	Move slightly to track the ball.	Move rapidly when batting or bowling.	Move in a twisting motion when batting or bowling.	Move to support the body's weight when batting or bowling.	gather the necessary equipment.	practice and play the game.	clean up and store the equipment.	swing the bat, run between wickets, and catch the ball.
playing cymbals	Move in a circular motion.	Move back and forth quickly and strike the cymbals together.	Move slightly from side to side and up and down in response to the beat.	Remain stationary to help keep the body balanced.	hold two cymbals in their hands.	strike the cymbals together.	move the cymbals to create a rhythm.	swing the cymbals together in quick, sharp movements.
playing didgeridoo	Move slightly with the rhythm of the music.	Move in a circular motion to manipulate the instrument.	Move slightly from side to side in time with the music.	Remain still to provide a strong base for the player.	obtain a didgeridoo.	practice producing the desired sound.	play the didgeridoo.	blow into the didgeridoo while moving lips and cheeks in circular motions.
playing drums	Bounce and move to the beat.	Strike drumheads and cymbals.	Move to the rhythm of the music.	Keep time by tapping a foot or moving in time with the music.	set up the drum kit.	strike the drums with sticks.	adjust the sound of the drums.	beat drums rhythmically.
playing flute	Remain still and upright.	Move up and down the flute to manipulate the notes.	Move to adjust posture and breathing.	Remain still and support the torso.	assemble the flute.	blow air through the flute.	press the keys to create sound.	blow into the flute while their fingers press down on the keys.
playing guitar	Stay relatively still, with subtle nods and head shakes.	Move quickly and dexterously up and down the fretboard, as well as strumming the strings.	Move slightly with the rhythm of the music.	Remain mostly stationary, but may tap along to the beat.	obtain a guitar.	practice chords and strumming techniques.	play the guitar.	Strumming and picking strings.
playing harmonica	Remain still while tilting slightly to the side.	Move up and down to create notes while pressing and releasing the harmonica.	Occasionally sway to the music for more expression.	Remain still in a comfortable standing or sitting position.	assemble the harmonica.	blow and draw air through the instrument.	create a melody with the harmonica.	blow air through the harmonica to create a musical sound.
playing harp	Remain still and focused on the music.	Alternate between plucking and strumming the strings of the harp.	Remain upright and still.	Remain still and relaxed.	select a harp.	tune the harp.	play the harp.	Strums the harp.
playing ice hockey	Turn and move from side to side to follow the puck.	Move quickly to pass, shoot, and catch the puck.	Bend and twist to maintain balance and power movements.	Push off to skate and maneuver on the ice.	put on protective gear.	skate on the ice and use a hockey stick to hit the puck.	attempt to score goals and defend their team's goal.	skate, pass, shoot, and check on the ice.
playing keyboard	Remain relatively still, either facing forward or slightly tilted downwards towards the keyboard.	Move quickly and accurately over the keyboard to press the notes and create the desired sound.	Remain relatively still, though may move slightly to aid in playing the keyboard.	Remain stationary, with occasional subtle movements to aid in playing.	sit at the keyboard.	press the keys to create music.	listen to the music they created.	press keys on the keyboard with their fingers.
playing kickball	Shake side to side while moving to kick the ball.	Reach forward to kick the ball.	Lean forward when kicking the ball.	Push off the ground to give the ball power and direction.	gather a group of people to play.	set up the field and equipment.	play the game.	kick the ball, run around the bases, and kick again.
playing monopoly	Move from side to side to view the board.	Roll the dice, move pieces around the board, pick up and place pieces, and count money.	Lean forward to get better view of the board.	Remain stationary, unless getting up from the table.	gather the game pieces, board, and money.	read the instructions and set up the board.	roll the dice and take turns moving around the board.	roll the dice, advance their piece, buy properties, build houses and hotels, and pay rent.
playing organ	Move slightly from side to side to reach the various keys and pedals.	Move quickly and accurately to push the keys and pedals.	Remain in a stationary, upright position.	Push the pedals with the feet.	sit at the organ.	press the keys and pedals.	listen to the music produced.	press the keys and use the pedals of the organ to create a melody.
playing paintball	move quickly to spot and dodge incoming paintballs.	hold the paintball gun and aim it at opponents.	twist and turn to dodge paintballs and cover more area quickly.	move quickly to find better cover and to chase opponents.	purchase the necessary equipment.	join a game of paintball.	shoot opponents with paintballs.	shoot paintballs at opponents with a paintball gun.
playing piano	Move subtly to the rhythm of the music.	Move quickly and precisely to press the keys.	Remain relatively still while the arms move.	Remain still and provide support.	sit at the piano.	place their hands on the keys.	press the keys to create music.	move their fingers rapidly over the keys of the piano.
playing poker	Remain still in a focused position.	Move to shuffle cards, pick up chips, and place bets.	Remain upright and steady.	Remain stationary in their seated position.	select their cards.	make bets and take turns.	evaluate their hand and determine the winner.	deal the cards, make bets, and attempt to win the hand.
playing recorder	Remain stationary, with the chin slightly tucked in to hold the recorder.	Move rapidly and precisely to cover the holes and create the desired notes.	Remain relatively still, with slight movements to help with breath control.	Remain stationary, with occasional small shifts in weight for comfort.	assemble the recorder.	blow into the recorder to make sound.	move their fingers to create different notes.	blow into and produce sounds with a recorder.
playing saxophone	Move up and down as the player blows and releases air into the instrument.	Move to press the keys and hold the saxophone.	Move from side to side as the player moves to reach different keys.	Remain stationary, with feet flat on the floor.	assemble the saxophone.	practice playing the saxophone.	perform with the saxophone.	move their arms in a rhythmic fashion as they blow into the mouthpiece and press keys on the saxophone.
playing squash or racquetball	Move from side to side as needed to track the ball.	Quickly and powerfully swing the racquet to hit the ball.	Twist and turn to reach the ball and hit it accurately.	Move quickly to get into position and provide balance.	select a racquet and appropriate footwear.	warm up and practice their strokes.	play the game with an opponent.	hit the ball with their racquet and move around the court.
playing tennis	Move from side to side for tracking the ball.	Move swiftly to hit the ball.	Twist and rotate to generate power in the swings.	Move to shift balance and generate power for the swings.	get a racket and tennis balls.	find a court and hit the ball back and forth.	score points and keep track of the game.	swing their racket and hit the ball back and forth over the net.
playing trombone	Move slightly up and down as the player breathes.	Move up and down the slides of the trombone.	Move slightly back and forth with each breath.	Remain stationary, providing stability.	assemble the trombone.	produce sound by buzzing their lips and pressing the valves.	move the slide to change the notes.	move their lips to form a tight seal around the mouthpiece, blow air into the instrument while pressing down the keys, and move the slide in and out.
playing trumpet	Remain stationary while blowing into the mouthpiece.	Move to hold the trumpet and press down the valves.	Move slightly to help support the instrument.	Remain stationary while playing.	assemble the trumpet.	practice playing the trumpet.	perform with the trumpet.	be playing the trumpet.
playing ukulele	Remain stationary, with some slight nodding.	Strum the strings and move up and down the fretboard.	Lean slightly forward, with arms moving up and down.	Remain stationary, with some slight tapping of the foot.	tune the ukulele.	strum the strings.	sing along.	strums ukulele strings lightly.
playing violin	Remain stationary, with the chin resting on the chin rest.	Move in a fluid, alternating motion to bow the strings.	Move slightly, to provide support to one hand while the other is bowing.	Remain still, with the feet flat on the floor.	obtain a violin and bow.	position the violin and bow correctly.	move the bow across the strings to produce sound.	bow, move the bow back and forth, and finger the strings of the violin.
playing volleyball	Move from side to side to track the ball.	Quickly move up to hit the ball and adjust the angle of the spike.	Twist and turn to follow the ball and keep the body balanced.	Jump and lunge to reach the ball and maintain balance.	get the necessary equipment.	set up the court and serve the ball.	hit the ball back and forth with their opponent.	jump, spike, and move to positions to receive and hit the ball.
playing xylophone	Remain still, looking towards the xylophone.	Move quickly from one key to the next to create the desired sound.	Lean slightly forward to reach the xylophone keys.	Remain stationary to keep the body steady.	assemble the xylophone.	strike the keys with mallets.	listen to the sound produced.	tap the keys with mallets to produce a rhythmic melody.
pole vault	Push off from the pole.	Grip the pole firmly and drive it upwards.	Follow the pole upwards in an arched motion.	Drive off the pole forcefully and help propel the body over the bar.	run towards the pole.	grab the pole and swing their body up and over the bar.	land on the other side of the bar.	run towards the pole, jump and grab it then use their momentum to vault over it.
presenting weather forecast	Move slightly to indicate emphasis or surprise.	Gesture naturally and expressively to emphasize points and illustrate concepts.	Move subtly to express interest or to indicate transitions.	Remain still and relaxed, with feet planted slightly apart.	gather data on the current weather conditions.	analyze the data and create a forecast.	present the forecast to the public.	stand in front of a camera, present the weather forecast, and gesture to illustrate their points.
pull ups	Remain stable and lifted in line with the spine.	Grip the bar and pull up until the chin is in line with the bar.	Remain slightly arched and pulled up with the arms.	Remain in a straight line and hang freely from the bar.	grasp the bar with an overhand grip.	pull their body up until their chin is above the bar.	lower their body back down to the starting position.	Pulls up body using arms.
pumping fist	Remain stationary.	Move up and down in a pumping motion.	Remain stationary.	Remain stationary.	curl their fingers into a fist.	raise their arm up and down.	release their fist.	pump their fist.
pumping gas	Turn to look at the gas pump and gauge.	Grasp the gas pump handle and operate the nozzle.	Leaning slightly forward to reach the gas pump handle.	Remain stationary, providing balance.	insert their credit card into the machine.	select the type of fuel and the amount they want to purchase.	remove their credit card and begin pumping the gas.	lift the pump nozzle, insert it into the car's fuel tank, and press the release handle to start the flow of gas.
punching bag	Jerk backwards with the force of the punch.	Swing forward to make contact with the bag.	Rotate and move with the force of the punch.	Plant firmly to provide a strong base for the punch.	stand in front of the punching bag.	throw punches at the punching bag.	step away from the punching bag.	swing their arm to punch the punching bag.
punching person (boxing)	Move slightly backward to dodge the punch.	Move quickly forward to deliver a punch.	Twist slightly to the side to give the arms more momentum.	Move slightly forward to increase the force of the punch.	raise their fist.	extend their arm and make contact with their target.	retract their arm and reset their stance.	extend their arm and punch their opponent.
push up	Remain in a neutral position.	Push down into the ground to lift the body up.	Raise up off the ground while keeping the body straight.	Remain straight and stationary.	get into a plank position.	lower their body until their arms are bent at a 90 degree angle.	push themselves back up to the starting position.	lower their body towards the ground, then push up and repeat.
pushing car	Remain upright and steady.	Push against the car.	Lean forward and push.	Push against the ground to help move the car.	position themselves behind the car.	push the car forward.	repeat the process until the car is in its desired location.	push the car.
pushing cart	Remain stationary.	Push on the handle of the cart.	Lean forward slightly.	Push against the ground to propel the cart forward.	grasp the handle of the cart.	apply pressure to the handle and push the cart forward.	release the handle and allow the cart to continue moving.	pushing the cart forward.
pushing wheelchair	Remain stationary but turned towards the wheelchair.	Push the handles of the wheelchair forward.	Bend slightly forward to generate power and momentum.	Push off the ground to propel the wheelchair forward.	grasp the handles of the wheelchair.	push the wheelchair forward.	adjust their grip as needed.	push a wheelchair.
reading book	Move slightly as eyes scan the words.	Hold the book in place.	Remain relatively still.	Remain in a stationary position.	select a book.	read the book.	reflect on the book.	be holding a book and looking at the pages.
reading newspaper	Tilt slightly forward and move from side to side while scanning the page.	Hold the paper and turn the pages.	Remain stationary, with the back slightly arched.	Remain still, with feet firmly planted on the ground.	obtain a newspaper.	scan the newspaper for interesting articles.	read the articles of interest.	be sitting or standing, with their eyes trained on the paper as they read it.
recording music	Move rhythmically to the music.	Play instruments, press buttons and turn knobs.	Move slightly to keep time.	Tap feet to the beat.	select the instrument or vocal track to record.	set up the recording equipment and adjust the sound levels.	record the track and make any necessary adjustments.	set up recording equipment, prepare a musical score and then record the music.
riding a bike	Remain upright and steady, looking ahead.	Grip the handlebars, turning them to steer and controlling speed with the brakes.	Remain balanced and upright, leaning slightly in the direction of turns.	Push the pedals to propel the bike forward.	mount the bike.	pedal the bike.	steer the bike.	pedal and steer the bike.
riding camel	Move up and down with the camel's gait.	Grip the camel's fur or reins.	Move up and down with the camel's gait, leaning forward and back to maintain balance.	Wrap around the camel's sides, helping to hold the rider in place.	mount the camel.	adjust their seating position.	direct the camel to move.	sit atop the camel and move along the terrain.
riding elephant	Move up and down, side to side with the motion of the elephant.	Hold onto the reins or the elephant's skin.	Stay in an upright position, swaying with the elephant's movement.	Wrap around the elephant's body, holding on tightly.	mount the elephant.	direct the elephant.	dismount the elephant.	ride an elephant.
riding mechanical bull	Move back and forth in sync with the bull's movements.	Hold onto the bull tightly.	Lean in the direction of the bull's movements.	Lock in place and grip the bull tightly.	mount the bull.	grip the handles and lean back.	hold on as the bull moves and buckles.	mount the mechanical bull and ride it, swaying back and forth.
riding mountain bike	Move from side to side to balance and scan for obstacles.	Hold handlebars and help guide the bike over rough terrain.	Lean into corners and stand up on hills to maintain balance.	Push pedals to provide power and propel the bike forward.	prepare the bike for the ride.	ride the bike over the terrain.	finish the ride and clean the bike.	peddle and maneuver a mountain bike along a trail.
riding mule	Move with the rhythm of the mule's gait.	Grip the saddle or reins for stability.	Rise and fall with the motion of the mule.	Wrap around the mule's sides to keep the rider secure.	mount the mule.	guide the mule with reins.	dismount the mule.	ride the mule.
riding or walking with horse	Move slightly with the horse's strides, keeping a steady rhythm.	Hold the reins, gently guiding and controlling the horse.	Move with the horse's strides, adjusting to the rhythm of the horse.	Push down in the stirrups, giving the horse cues and helping to control its movements.	prepare the horse for riding or walking.	mount the horse and begin riding or walking.	dismount the horse and end the ride or walk.	ride or walk with a horse.
riding scooter	Remain upright and balanced while looking ahead.	Grip the handlebars to steer the scooter.	Maintain balance and help keep the scooter stable while riding.	Push off the ground to propel the scooter forward.	mount the scooter.	start the scooter.	ride the scooter.	ride the scooter.
riding unicycle	Move in circles to help maintain balance.	Move up and down to help provide balance and steer the unicycle.	Move side to side to help maintain balance and shift weight.	Push down on the pedals to propel the unicycle forward.	mount the unicycle.	balance and pedal.	dismount the unicycle.	ride a unicycle.
ripping paper	Remain stationary.	Clench together to grip the paper and then move apart quickly.	Lean in towards the paper.	Remain stationary.	grasp the paper firmly.	pull the paper apart quickly.	discard the torn pieces.	tear the paper vigorously.
robot dancing	Move rhythmically from side to side.	Swing outwards and inwards in time with the music.	Twist and turn in a swaying motion.	Step back and forth, alternating feet.	move their arms and legs in a robotic manner.	add robotic facial expressions.	add robotic sound effects.	move their arms and legs in a jerky, robotic manner.
rock climbing	Turn and tilt to look for hand and foot holds.	Reach for and grip holds, as well as push or pull for leverage.	Rotate and twist to adjust body position.	Push off from holds and push the body up the wall.	select and prepare their gear.	climb the rock face.	rappel down the rock face.	grasp the rock and pull themselves up, pushing with their feet for balance.
rock scissors paper	Remain still	Move in a quick motion to form a rock, scissors, or paper shape	Remain still	Remain still	make a fist with their hand.	then open their hand to reveal either a rock, scissors, or paper.	then compare their hand with the other person's to determine the winner.	gesture as if throwing out a rock, then form a pair of scissors with their fingers, then shape their fingers into a paper.
roller skating	turn side to side and lean forward and back.	alternate pushing off the ground and gliding.	lean side to side to help make turns.	alternate pushing off the ground and gliding.	put on roller skates.	push off and glide.	repeat the pushing and gliding motion.	roll forward on skates.
running on treadmill	Remain upright and facing forward.	Swing back and forth in a rhythmic cadence.	Lean forward slightly and rotate from side to side.	Move back and forth, propelling the body forward.	step onto the treadmill.	adjust the speed and incline.	begin running.	be running and pounding the treadmill belt with their feet.
sailing	Turn left and right to keep the boat balanced.	Pull the rigging and adjust the sails to control the direction and speed of the boat.	Twist and bend to adjust the position of the hands.	Brace against the side of the boat for stability while sailing.	prepare the boat and equipment.	launch the boat and navigate the waters.	dock the boat and secure it.	move swiftly across the water in a vessel.
salsa dancing	Move slightly in time with the beat of the music.	Pulse and twist in a variety of directions, often making intricate patterns.	Follow the beat of the music with subtle hip and shoulder movements.	Step rhythmically and alternate between a variety of foot patterns.	learn the basic steps.	practice the steps with a partner.	add their own style and flair to the dance.	move their hips and body to the rhythmic beat of the salsa music.
sanding floor	Remain stationary.	Move back and forth in a sanding motion.	Move side to side and slightly bend to reach lower areas.	Remain stationary, while the hips and knees may adjust to maintain balance.	prepare the floor by sweeping and vacuuming.	apply sandpaper to the floor and sand it.	clean the floor to remove dust and debris.	move a sanding tool over the floor in circles or straight lines.
scrambling eggs	Move side to side to mix ingredients.	Move quickly to whisk eggs.	Bend slightly to reach ingredients.	Remain stationary.	crack the eggs into a bowl.	whisk the eggs together.	cook the eggs in a pan.	vigorously mix eggs in a bowl.
scuba diving	Move side to side, up and down, and rotate to look in all directions.	Move in a circular motion to help propel the body through the water.	Rotate side to side to help with balance and momentum.	Kick in a alternating, synchronised motion to help move through the water.	prepare their gear.	enter the water.	explore the underwater environment.	submerge into the water with scuba gear, navigating around submerged environment.
setting table	Move from side to side to survey the table.	Reach out and grasp the desired items to place on the table.	Lean forward slightly to reach the table.	Remain still to keep balance while reaching for items.	gather the necessary items for setting the table.	arrange the items on the table in the desired manner.	check the table to ensure everything is in place.	arrange plates, cups, and utensils on the table.
shaking hands	Remain still with a slight nod.	Reach out and grasp each other.	Lean forward slightly.	Remain stationary.	extend their arm.	clasp the other person's hand.	move their hands up and down.	extend their arm forward, grasp another's hand, and shake it back and forth.
shaking head	Shake rapidly back and forth.	Remain still, either at the side, or clasped together.	Remain still.	Remain still.	tilt their head slightly.	move their head back and forth.	stop the movement and return their head to its original position.	shake their head back and forth.
sharpening knives	Move slightly to help with precision and accuracy.	Move in a back-and-forth motion to sharpen the knife.	Remain stable to help support and direct the motion of the hands.	Remain stationary.	gather the knives.	sharpen the knives.	test the sharpness of the knives.	sharpen knives with a quick, precise motion.
sharpening pencil	Tilts forward slightly.	Grip pencil and move back and forth to sharpen.	Lean slightly forward to provide support to arms.	Remain stationary.	hold the pencil.	sharpen the pencil using a sharpener.	check the sharpness of the pencil.	hold the pencil firmly and draw it along the sharpener.
shaving head	rotate from side to side to cover the entire head.	hold the razor and move it in small, precise motions.	remain relatively still while the head moves.	remain still and steady to provide a stable base.	prepare the area by washing the head with warm water.	use a razor or clippers to remove the hair.	apply an aftershave lotion to soothe the skin.	run a razor over their scalp.
shaving legs	Remain stationary.	Move in a downward, upward, and side-to-side motion.	Stay balanced and upright while moving hands.	Be bent and lifted to allow access to the skin.	lather up their legs with shaving cream.	use a razor to shave their legs.	rinse off their legs and apply aftershave.	run a razor up and down their legs.
shearing sheep	bob up and down.	hold and guide the sheep's head.	bend and twist to keep the sheep in place.	remain firmly planted on the ground.	prepare the sheep for shearing.	use clippers or shears to remove the wool.	collect and package the wool for sale.	repetitively pass a shearing tool through the wool of the sheep.
shining shoes	remain still, looking down at the shoes.	move the cloth back and forth, in circular motions.	lean forward slightly to provide better access to the shoes.	remain still, providing support for the upper body.	clean the surface of the shoes.	apply a polish or wax to the shoes.	buff the shoes to a shine.	rub the shoes with a cloth and then buff them to a shine.
shooting basketball	Tilt slightly backward as the shot is taken.	Grip the ball and extend forward to release the shot.	Twist to the side as the arms extend forward.	Bend slightly and provide power to the shot.	grip the ball.	raise their arm and shoot the ball.	follow through with their arm and release the ball.	extend their arm towards the basket, bending the elbow to release the ball from their hand.
shooting goal (soccer)	Snap forward and up to glance at the goal.	Extend out to kick the ball with full force.	Twist to the side to face the goal and create momentum for the kick.	Stabilize the body and propel the kicking leg forward.	position themselves in front of the goal.	take aim and kick the ball.	follow through and celebrate.	kick the ball towards the goal.
shot put	Push forward and rotate slightly upward.	Push the shot away from the body.	Rotate powerfully and explosively.	Drive powerfully off the ground and thrust the body forward.	take a wide stance and set their feet.	bend their knees and swing the shot put back.	thrust their hips forward and release the shot put.	throw a shot put forward with an explosive force.
shoveling snow	Move from side to side.	Push the shovel forward and scoop up the snow.	Bend forward and twist from side to side.	Push off the ground to propel the body forward.	gather a shovel.	scoop the snow into piles.	move the piles away.	swiftly scoop and move snow with a shovel.
shredding paper	Tilting side to side to get a better view of the paper.	Grabbing and crumpling the paper.	Leaning forward and backwards while shredding the paper.	Remaining stationary while shredding.	gather the papers to be shredded.	feed the papers into the shredder.	dispose of the shredded paper.	grasp the paper, rip it into strips, and feed it into a shredding machine.
shuffling cards	Remain still.	Shuffle the cards by holding them between the thumbs and fingers and moving them around.	Remain still.	Remain still.	gather the cards.	mix the cards.	spread the cards out.	rapidly shuffle the cards by using both hands to mix them together.
side kick	Remain stationary and facing forward.	Extend outward and slightly up as they rotate from the shoulder joint.	Twist to the side in the direction of the kick.	Swing outwards and up to deliver a kick to the side of the target.	bend their knee and lift their leg up to the side.	extend their leg out straight and kick.	return their leg to the starting position.	swing one leg out to the side in a kicking motion.
sign language interpreting	Move subtly to indicate emphasis and emotion.	Move to form shapes and gestures that represent the words being spoken.	Move to accentuate the shapes and gestures made by the hands.	Remain still, as they are not typically used for sign language interpreting.	observe the speaker and interpret their message into sign language.	then express the message in sign language.	then interpret the response from the recipient into spoken language.	use hand gestures and facial expressions to interpret sign language.
singing	Move slightly from side to side, as well as up and down.	Move to help keep time with the music and to emphasize certain words or lines.	Move to the rhythm of the music, with occasional swaying or rocking movements.	Remain mostly still, but may shift in time with the music.	take a deep breath.	produce sound with their vocal chords.	shape the sound into words and melody.	croon and hum notes in rhythm.
situp	Flex forwards and backwards.	Reach up and down.	Flex and twist.	Remain stationary.	lie on their back with their knees bent.	then curl their torso up towards their knees.	then lower their torso back down to the starting position.	bend at the waist and lift their upper body to an upright seated position.
skateboarding	Remain relatively still while maintaining balance.	Push off the ground and grip the board.	Shift side to side to maintain balance.	Push off the ground to propel the board.	put on a helmet and safety gear.	mount the skateboard and push off.	maneuver the skateboard and perform tricks.	skateboard.
ski jumping	Remain upright and balanced throughout the jump.	Remain extended forward to help maintain balance and provide propulsion.	Remain slightly bent forward to help maintain balance and provide propulsion.	Generate momentum and power by pushing off the ramp and extending forward in a V shape.	prepare for the jump.	take off from the ski jump.	land safely.	sprint down a slope, launch themselves off a ramp, and soar through the air before landing on the snow.
skiing (not slalom or crosscountry)	Head would	Grip the ski poles firmly and move in a synchronised, rhythmic motion.	Remain upright and in an athletic stance, shifting from side to side for balance.	Bend slightly and move together in a synchronised motion to control speed and direction.	put on their skis and boots.	move down the mountain, making turns.	stop and remove their skis and boots.	glide down a snow-covered slope, turning and carving their way downhill.
skiing crosscountry	Remain in an upright position, facing forwards.	Swing backwards and forwards in time with the legs.	Remain upright and rotate from side-to-side as needed to maintain balance.	Push off the ground in an alternating pattern to propel the skier forward.	prepare for the ski trip.	ski across the terrain.	finish the ski trip.	traverse cross-country on skis.
skiing slalom	Remain steady, facing forward.	Move side to side, shifting weight to turn the skis.	Lean left and right with the turns.	Flex and extend to make quick turns.	prepare by setting up the course.	ski down the course, navigating around the gates.	finish the course and come to a stop.	ski down a zigzag course, alternating between left and right turns.
skipping rope	Move up and down in a rhythmic motion.	Swing the rope in circles, alternated with each hand.	Remain upright and stable, with slight bouncing.	Move in an alternating hopping motion.	grab the rope.	swing the rope over their head.	jump over the rope as it passes beneath them.	jump in an alternating rhythm over an object they are holding with both hands.
skydiving	Stay upright and facing forward.	Move in a controlled manner to adjust body position and orientation while falling.	Remain in an upright, sitting position while in the air.	Remain in a tucked position while in the air.	prepare for the jump.	jump from the plane.	land safely.	freefall from a great height, before deploying their parachute.
slacklining	Remain stable and upright.	Grip the slackline for balance.	Bend slightly forward and sway side-to-side to maintain balance.	Bend and straighten to keep on the slackline.	set up the slackline.	balance on the slackline.	practice tricks on the slackline.	balance on a line suspended between two points.
slapping	jerk back slightly	clap together with force	rotate slightly	remain stationary	raise their hand.	swing their hand forward.	make contact with the target.	raise their hand and quickly bring it down onto their target.
sled dog racing	Bob up and down rhythmically from the pull of the sled.	Grip the sled handle tightly to help propel the dog forward.	Lean forward and strain against the harness to pull the sled.	Move quickly and powerfully to propel the sled forward.	prepare the sled and dogs.	race the sled and dogs.	finish the race and care for the dogs.	run with the sled, navigating through a trail while dogs pull the sled.
smoking	Move slightly from side to side as the person inhales and exhales.	Hold the cigarette or cigar between the fingers.	Lean forward slightly while inhaling.	Remain still, or shift position slightly.	obtain a cigarette.	light the cigarette.	inhale and exhale the smoke.	inhale and exhale smoke.
smoking hookah	Tilt slightly forward to bring the hookah hose to the mouth.	Steady the hookah base and hold the hose to the mouth.	Remain in an upright and relaxed position.	Remain in a comfortable, relaxed position.	prepare the hookah.	light the charcoal and place it on the hookah.	inhale the smoke from the hookah.	inhale deeply and exhale a plume of smoke from the hookah.
snatch weight lifting	Remain stationary and look straight ahead.	Quickly pull the barbell off the ground and up towards the chest.	Move upright and pull the barbell towards the hips.	Extend forcefully to help generate power to lift the barbell.	grip the barbell.	lift the barbell off the ground explosively.	catch the barbell in an overhead position.	quickly lift the weight up in a single motion.
sneezing	jerk backward and upward.	grasp the face or cover the nose and mouth.	contract and expand suddenly.	remain still.	inhale deeply.	exhale forcefully.	expel air and other particles from the nose and mouth.	quickly exhale and then inhale sharply.
sniffing	Move up and down slightly.	Remain still.	Remain still.	Remain still.	inhale deeply.	draw air into their nose.	detect odors with their olfactory receptors.	take a deep inhalation through the nose.
snorkeling	Move up and down while breathing and keeping the face submerged.	Move slowly along with the body to propel the snorkeler forward.	Remain still and upright while the arms and legs move.	Kick in a flutter kick motion to propel the body forward.	put on a snorkel and mask.	enter the water and swim around.	observe the underwater environment.	swim underwater wearing a mask and snorkel.
snowboarding	Turn and tilt to control direction and balance.	Grip the edges of the board to steer and balance.	Twist and lean to shift weight and center of gravity.	Bend and extend to control speed and direction.	put on their snowboarding gear.	ride down the slope.	dismount from the board.	snowboard down a slope, executing jumps and tricks.
snowkiting	Turn to anticipate the direction of the wind.	Control the kite and direct its movements.	Move to maintain balance and adjust the angle of the kite.	Push off the ground and shift weight to control speed and direction.	set up their kite and attach it to their snowboard.	use the wind to pull them across the snow.	use their body to steer and control the kite.	ski or snowboard while being pulled by a kite across the snow.
snowmobiling	Move side to side to maintain balance and control.	Grip the handlebars and move side to side to control the snowmobile.	Lean in the direction of the turns and lean back when accelerating.	Push off the seat to maintain balance and control.	prepare the snowmobile.	ride the snowmobile.	store the snowmobile.	snowmobile across the terrain.
somersaulting	Rotate over the top and land facing the opposite direction.	Push off the ground to lift the body and rotate over.	Tuck into a ball and rotate over in a complete circle.	Lift and rotate over in a circular motion.	bend their knees and tuck their chin.	roll forward, pushing off with their hands.	extend their legs and arms, completing the somersault.	somersault.
spinning poi	Rotate in a circular motion.	Move in a circular motion, in coordination with the head.	Move in a circular motion, usually with a slight twist to both sides.	Remain stationary, with occasional stepping or shuffling to maintain balance.	grip the poi handles.	swing the poi in circles around their body.	vary the speed and direction of the poi.	twirl two weights connected by a cord in circles while spinning their body.
spray painting	Move to adjust the angle of the paint sprayer.	Move to control the sprayer's trigger.	Move to adjust the position of the sprayer.	Move to help shift the body's position for better access to the area to be painted.	prepare the surface to be painted.	apply the spray paint.	allow the paint to dry.	shake and move the can of paint, pressing down on the nozzle to disperse paint onto the surface.
spraying	Move in a sweeping motion from side to side.	Move in a quick, jerky motion to spray the liquid.	Remain relatively still, with slight twisting motion when changing direction.	Remain stationary, with slight shifting for balance.	grasp the spray can.	press the nozzle to release the spray.	direct the spray onto the desired surface.	wave their arm while holding a spray bottle and press down on the nozzle to release a mist of liquid.
springboard diving	rotate upwards and back towards the board.	reach up and grasp the edge of the board.	arch and bend backwards.	bend and kick off the board for momentum.	approach the springboard.	take a running jump onto the springboard.	perform a dive off the springboard.	Jump off a platform, twist and flip in the air before entering the water.
squat	Remain upright and face forward.	Remain in front of the body, palms facing downwards.	Bend at the hips and knees until the thighs are parallel to the ground.	Bend and lower the body until the thighs are parallel to the ground.	stand with feet hip-width apart.	bend their knees and lower their hips.	return to standing position.	bend their knees and lower their body into a squatting position.
sticking tongue out	Tilt the chin up slightly.	Remain still.	Remain still.	Remain still.	open their mouth.	extend their tongue.	press their tongue against their lips.	stick their tongue out.
stomping grapes	Remain stationary.	Press down forcefully on the grapes.	Lean forward to provide leverage.	Push down with force.	place their feet in a vat of grapes.	stomp on the grapes with their feet.	press the grapes to extract the juice.	vigorously stomp the grapes.
stretching arm	Remain still.	Reach up and overhead, stretching out the arm.	Remain still.	Remain still.	raise their arm.	extend their arm outwards.	hold the stretch for a few seconds.	raise arm up and out.
stretching leg	Remain stationary	Reach forward to grasp the leg being stretched	Remain upright, with hips and chest facing forward	Lift and extend outward in front of the body	stand up straight.	extend one leg out in front of them.	hold the stretch for a few seconds.	extend their leg and hold it in place for a few seconds.
strumming guitar	Remain still, with chin tilted slightly downwards.	Move quickly and rhythmically up and down the strings.	Twist slightly from side to side.	Remain still, planted firmly on the ground.	grip the guitar pick.	move the pick across the strings.	release the pick and repeat.	strum the guitar.
surfing crowd	Move side to side to keep balance and stay centered on the board.	Grip the sides of the board for stability and to help turn and maneuver the board.	Remain upright while the board is in motion, and lean forward and back to help steer.	Adjust the weight to keep balance, and shift to control speed and direction.	search for a suitable crowd to join.	observe the crowd to understand the dynamics.	interact with the crowd to gain insights.	ride a wave on a surfboard, amongst a crowd of other surfers.
surfing water	Move side-to-side with the waves.	Push down on the board to stabilize and steer.	Lean in the direction of the wave to maintain balance.	Kick and paddle to propel the board forward.	get on the board.	paddle out to the wave.	ride the wave back to shore.	glide through the water on a surfboard.
sweeping floor	Move from side to side, scanning ahead.	Push a broom in a sweeping motion.	Bend to help reach lower areas.	Step forward to move the body along the floor.	gather a broom and dustpan.	sweep the floor with the broom.	collect the dirt and debris with the dustpan.	move a broom back and forth across the floor.
swimming backstroke	Remain in a fixed position, facing up towards the surface of the water.	Move alternately, pushing water backward in a windmill motion.	Rotate from side to side in a gentle rolling motion.	Kick in a synchronised, alternating fashion, creating propulsion.	take a deep breath and begin to kick their legs.	then pull their arms back in a circular motion.	then rotate their body and repeat the motion.	swim with alternating strokes of arms and legs.
swimming breast stroke	Turn from side to side in a rhythmic motion.	Move in a circular motion, pushing against the water to propel the swimmer forward.	Rotate from side to side, with the arms and legs moving in tandem.	Move in a frog-like kick motion, providing the forward propulsion.	extend their arms forward and pull back in a circular motion.	kick their legs in a frog-like motion.	rotate their head to the side to breathe.	move their arms in a circular motion while alternating a kicking motion with their legs.
swimming butterfly stroke	Move from side to side in a alternating pattern.	Move in a circular motion with the palms facing downward.	Twist from side to side in a wave-like pattern.	Move in a alternating pattern of up and down motions.	begin with a dolphin kick.	then alternate arms in a windmill motion.	finish with a flutter kick.	perform a butterfly stroke by alternating arms and kicking their feet in a synchronous, wave-like motion.
swing dancing	Move lightly in time with the music.	Move in rhythmic, circular motions.	Move back and forth, swaying with the beat.	Swing back and forth, slashing out to the sides.	find a partner.	learn the steps and practice.	perform the dance.	swing their arms and legs in rhythm to the music.
swinging legs	Remain stationary	Remain stationary	Rotate side to side	Swing in an arc back and forth	bend their knees.	lift their legs and swing them forward.	lower their legs and repeat.	swing their legs side to side.
swinging on something	Twist side to side.	Grip tightly and swing back and forth.	Move with the arms and twist side to side.	Swing in tandem with the arms and torso.	grab onto the object.	use momentum to swing.	release the object.	swing back and forth.
sword fighting	Move in quick, jerky motions to dodge and parry.	Swing the sword, block incoming attacks, and jab at opponents.	Twist and rotate in order to move with the sword swings and provide balance.	Move back and forth to shift weight and create momentum for sword strikes.	select a sword and protective gear.	practice and perfect their technique.	engage in a sparring match with an opponent.	move their sword rapidly, slicing and thrusting through the air in a choreographed dance.
tai chi	Move in a circular motion, focusing on keeping the chin tucked in.	Move in graceful, slow, and deliberate motions, keeping the wrists and elbows relaxed.	Move in a gentle, fluid motion, with a focus on breathing and relaxation.	Move gracefully, with a focus on balance and coordination.	stand in a relaxed posture.	move slowly and gracefully through a series of postures.	focus on their breathing and the flow of energy throughout their body.	move slowly and gracefully, alternating between stretches and poses combined with deep breaths.
taking a shower	tilt back to allow water to rinse over face and hair.	move to lather soap and shampoo, and to rinse off.	bend and twist to reach all areas.	lift and step to allow water to reach lower body.	turn on the water.	lather up with soap and shampoo.	rinse off and turn off the water.	stand under the shower head, wet their body, lather up with soap, rinse off, and finally turn off the shower.
tango dancing	Move slowly and gracefully in time with the music.	Move in gentle, intricate patterns to create shapes and lines.	Twist and turn in smooth, sweeping motions.	Step rhythmically in time with the music, with a slight flex in the knees.	learn the steps.	practice the steps.	perform the steps.	move their feet quickly in a box-step pattern, swaying hips, and shifting their weight from heel to toe with dramatic arm gestures.
tap dancing	Move rhythmically with a variety of taps and turns.	Move in coordination with the feet, in time with the music.	Move with the legs and arms, emphasizing the rhythm of the music.	Move in a variety of taps and steps, in time with the music.	prepare their feet and body.	rhythmically tap their feet to music.	move their body to the beat of the music.	tap their feet rhythmically on the floor and shuffle back and forth, clapping their hands in time with the music.
tapping guitar	Remain still and bob slightly in time with the rhythm.	Alternate quickly between plucking and strumming the strings.	Stay in place while rocking back and forth in time with the rhythm.	Remain planted on the ground while tapping the foot to the beat.	pick up the guitar.	strum the strings.	tap the strings with their fingers.	tap the guitar.
tapping pen	Remain stationary.	Quickly and lightly tap the pen up and down.	Remain still.	Remain still.	pick up the pen.	move the pen up and down.	release the pen.	Tap the pen rhythmically.
tasting beer	tilt backward slightly as the beer is sipped.	hold the beer glass.	remain stationary.	remain stationary.	smell the beer.	take a sip of the beer.	swallow the beer and evaluate the taste.	bring the beer to their lips and take a sip.
tasting food	Move forward slightly to bring food closer to the mouth.	Bring food to the mouth.	Remain relatively still.	Remain still, with only minimal movements such as shifting weight.	smell the food.	take a bite of the food.	chew and swallow the food.	lick, sample, and savor the food.
testifying	Nod or shake in agreement or disagreement.	Be held up to emphasize points or make a gesture.	Lean forward to appear engaged and interested.	Remain still to maintain a seated position.	present evidence.	answer questions from the court.	summarize their testimony.	raise their hand and speak their testimony.
texting	Move slightly to look at the phone.	Tap on the keyboard or screen.	Bend slightly down to view the phone.	Remain still.	compose a message.	send the message.	receive a response.	tap their fingers on a device.
throwing axe	Push forward and up.	Grip the axe and throw with a strong and swift motion.	Twist to the side and rotate.	Remain stationary or pivot for balance.	grip the axe firmly.	swing their arm to throw the axe.	release the axe from their hand.	raise their arm and release the axe.
throwing ball	tilt slightly back as arm is cocked.	grip the ball and throw it forward.	twist to the side to generate power and momentum.	plant firmly and provide stability as the ball is thrown.	grip the ball.	raise their arm and swing it forward.	release the ball.	throw the ball.
throwing discus	Rotate to the left as the discus is thrown.	Quickly release the discus while rotating the arms.	Twist to the right and pivot at the hip to generate power.	Push off the ground to generate momentum for the throw.	take a discus in their hand.	spin their body and throw the discus.	follow through with their arm and release the discus.	wind up and throw the discus.
tickling	Shake and bobble.	Gently brush against the ticklee's skin.	Twist and wriggle.	Kick and move away.	move their fingers or hands lightly over the other person's body.	cause the other person to laugh or giggle.	stop the tickling.	lightheartedly move their fingers over the other person's body in an attempt to elicit laughter.
tobogganing	Stay upright, facing forward.	Grip the sides of the toboggan for balance and control.	Lean slightly forwards with arms outstretched for balance.	Push off the ground to gain speed and remain tucked in close to the toboggan.	sit on a toboggan.	push off and slide down a hill.	steer the toboggan to the bottom of the hill.	slide quickly down a sloped surface on a sled.
tossing coin	Lift up and turn slightly.	Clasp the coin and throw it.	Lean forward slightly and twist to the side.	Remain stationary.	pick up the coin.	throw the coin into the air.	catch the coin.	throw the coin into the air.
tossing salad	Tilting back and forth.	Quickly tossing ingredients together.	Rotating side to side.	Staying in place.	gather the ingredients.	mix the ingredients together.	serve the salad.	throw the salad with their hands.
training dog	Move in circles as the dog is being trained.	Be used to gently guide the dog through the commands and behaviors.	Remain upright and still while the dog is being trained.	Remain still to create a stable platform for the trainer.	establish a routine of commands and rewards.	practice the commands and rewards with the dog.	reinforce the commands and rewards to ensure the dog learns.	actively train the dog.
trapezing	Move in a circular motion.	Swing back and forth from the trapeze bar.	Twist and turn to help maintain balance.	Swing up and down to help propel the body while in the air.	grasp the trapeze bar.	swing their body, using momentum to propel them higher.	release the bar and perform a trick or dismount.	swing along a trapeze bar, flipping and spinning in the air.
trimming or shaving beard	tilt in different directions to access all areas of the beard.	hold the razor or trimmer and move it across the beard in even strokes.	lean forward and to the side to make sure all areas are accessible.	remain still to provide a stable base for the upper body.	gather the necessary tools.	begin trimming or shaving the beard.	finish trimming or shaving the beard.	drag a razor across their beard in small, precise strokes.
trimming trees	Move side-to-side to focus on branches needing to be trimmed.	Grip and maneuver pruning shears to cut branches.	Twist and bend in different directions to reach branches at different angles.	Balance the body while standing on ladders or other elevated surfaces to reach higher branches.	prepare the tools necessary for trimming the trees.	cut away any dead or overgrown branches.	clean up any debris from the trimmed trees.	trim the trees.
triple jump	remain upright and still throughout the jump.	move forward in a sweeping motion to generate momentum.	twist and rotate in the air to help generate the momentum needed for the third jump.	thrust upwards and outwards in order to propel the body forward and into the third jump.	take off from the take-off board.	land on the same foot as the take-off.	jump a third time and land on the opposite foot.	jump three times in quick succession.
tying bow tie	Remain still.	Cross over each other and loop the fabric of the tie around itself.	Lean forward slightly to allow access to the neck area.	Remain still.	place the bow tie around their neck.	adjust the bow tie so that the two ends are even.	tie the two ends of the bow tie into a knot.	secure one end of the tie in a bow and loop the other end around, crossing the two side and then pull the bow tight.
tying knot (not on a tie)	Remain stationary, looking down at the knot.	Cross over and intertwine the strings, tugging them to tighten the knot.	Bend forward slightly to get a better view of the knot.	Remain stationary.	select two ends of a rope.	cross the two ends and loop one end around the other.	pull the ends tight to secure the knot.	wrap the cord around itself, pull it tight, and form a knot.
tying tie	tilt back slightly to observe tie.	grasp material and loop over one another, pull tight to secure.	twist to the side to provide better access for hands.	remain stationary.	drape the tie around the neck.	cross the wide end of the tie over the narrow end.	loop the wide end around the narrow end and pull it through the knot.	grab, loop, and knot the tie.
unboxing	move side to side as the person looks around for the box opener.	open the box and remove its contents.	bend forward slightly to help reach inside the box.	remain stationary to provide balance and stability while manipulating the box.	remove the packaging.	take out the contents of the box.	assemble the items or set them up for use.	open the box, remove the item, and discard the packaging.
unloading truck	Turn to scan for obstructions.	Lift and carry boxes from the truck.	Bend and twist to reach for boxes in the truck.	Push off the ground to move forward while carrying boxes.	open the truck.	unload the cargo.	secure the truck.	lift objects from the truck and place them elsewhere.
using computer	Tilt slightly forward to view the screen.	Type on the keyboard and manipulate the mouse.	Remain mostly stationary, but may shift to adjust to the computer monitor.	Remain mostly stationary, but may adjust for comfort.	turn on the computer.	open the necessary programs.	complete the desired task.	type on the keyboard and use the mouse to navigate.
using remote controller (not gaming)	Move slightly to indicate different button selections.	Maneuver the remote controller to press different buttons.	Remain stationary to maintain balance and stability.	Remain stationary to maintain balance and stability.	pick up the remote controller.	press the desired buttons.	observe the results of the action.	press buttons on the remote controller.
using segway	Remain relatively still, as the Segway balances the rider.	Grip the handlebars to help control the Segway's direction and speed.	Lean slightly in the direction of desired travel.	Remain relatively still, as the Segway is self-balancing and requires no leg action to move.	mount the Segway.	balance on the Segway.	move forward on the Segway.	ride a Segway.
vault	Thrust upward and tuck in tightly.	Push off the ground for momentum and then be placed above the head.	Bend backward and propel the body upward.	Push off the ground to help generate power and momentum.	approach the vault.	jump and grab the vaulting surface.	pull themselves over the vaulting surface.	jump up, bring their feet and hands over a raised surface, and land on the other side.
waiting in line	Remain upright and facing forward.	Hang loosely at sides or clasp together in front.	Remain upright and facing forward.	Remain stationary or shift weight from side to side.	join the line.	wait for their turn.	move forward when it is their turn.	stand in line.
walking the dog	Remain relatively still, while turning slightly from side to side.	Move back and forth in a steady rhythm.	Move in a rocking motion from side to side.	Move in an alternating pattern, with one foot in front of the other.	attach the leash to the dog's collar.	take the dog for a walk.	return home and remove the leash.	walk alongside the dog.
washing dishes	Move forward and back to reach different sections of the sink.	Be submerged in water to scrub dishes and rinse them.	Lean over the sink and twist to reach different plates.	Support the body while standing at the sink.	gather the dishes.	wash the dishes.	dry the dishes.	scrub the dishes with a sponge and rinse them with water.
washing feet	Move back and forth slightly while washing feet.	Move up and down to scrub feet.	Bend slightly forward and back while washing feet.	Remain still while the feet are being washed.	fill a basin with warm water.	use a washcloth to scrub their feet.	rinse their feet with clean water.	bend down and wash their feet.
washing hair	Tilts and moves side to side.	Rub shampoo into scalp and massage the scalp.	Bend forward and lean down.	Remain stable in a standing position.	wet their hair.	lather their hair with shampoo.	rinse their hair with clean water.	lather shampoo in their hair and rinse it out.
washing hands	Tilt slightly forward and downward.	Move in circular motions, scrubbing palms and between fingers.	Remain relatively still, while arms move.	Remain stationary.	wet their hands.	lather their hands with soap.	rinse their hands.	rub hands together with soap and water, rinse and dry.
water skiing	Remain steady and facing forwards.	Hold the ski handles firmly.	Be bent slightly forward from the hips.	Bend slightly to absorb shock and keep balance.	put on a life jacket and ski bindings.	hold onto a tow rope and ski on the water.	make turns and jumps while skiing.	be gliding on the surface of the water, propelled by a boat, while skiing with skis.
water sliding	remain upright, facing forward.	remain in front of the body, gripping the edges of the slide.	lean slightly back and stay in close contact with the slide.	remain straight and extended, pressing against the sides of the slide.	climb the stairs to the top of the slide.	sit down and slide down the slide.	splash into the pool at the bottom of the slide.	slide down the water slide quickly.
watering plants	tilt forward to observe the plants.	reach for the watering can and move it over the soil.	twist to reach different plants.	remain stationary to balance the body.	gather the necessary supplies.	water the plants.	clean up any mess.	grab a watering can, fill it with water, and slowly pour it over the plants.
waxing back	Remain stationary.	Make a sweeping motion, starting from the shoulders and moving towards the lower back.	Twist slightly in one direction while the hands move in the opposite direction.	Remain stationary.	1: Apply wax to the back.	2: Spread the wax evenly.	3: Remove the wax with a cloth.	move their arm backwards in a waxing motion.
waxing chest	Remain still.	Make large circular motions in an outward direction from the center of the chest.	Remain still.	Remain still.	apply wax to the chest area.	use a cloth strip to pull the wax off.	use a moisturizer to soothe the skin.	move a waxing strip in an upward motion over their chest.
waxing eyebrows	Remain still.	Move in small, gentle, upward strokes to pluck the eyebrows.	Remain still.	Remain still.	clean the eyebrows with a damp cloth.	apply the wax to the eyebrows.	remove the wax with a cloth strip.	brush wax upwards on their eyebrows.
waxing legs	Remain stationary.	Move in circular motions from the ankle to the thigh.	Lean forward slightly.	Remain stationary while hands move over them.	prepare the area by cleaning the legs with soap and water.	apply the wax in the direction of the hair growth.	remove the wax in the opposite direction of the hair growth.	move the wax strip up the leg in short strokes.
weaving basket	Remain stationary, looking down at the basket.	Alternately move in a weaving motion, creating the basket.	Bend forward slightly to maintain an optimal view of the handiwork.	Remain stationary to provide a stable foundation for the upper body.	gather the materials needed to make the basket.	begin weaving the basket, starting with the base.	finish weaving the basket, adding any embellishments.	move their hands rapidly, passing the threads around in a criss-cross pattern to form the basket.
welding	remain stationary, focusing on the welding task.	move the welding gun in a controlled manner and steady the material being welded.	remain in a steady position, supporting the head and arms.	remain still, supporting the torso.	prepare the materials to be welded.	join the materials together using heat and a filler material.	complete the weld by cooling and inspecting the joint.	move their arm swiftly, filling a gap with liquid metal as sparks fly.
whistling	Remain relatively still while making a pursed-lipped whistle.	Remain at the sides or be used to modulate the whistle.	Remain in an upright position, while taking breaths for whistling.	Remain relatively still while whistling.	purse their lips.	blow air through their lips.	shape their lips to create a desired sound.	whistle.
windsurfing	Move side to side to keep balance and direct the board.	Move to adjust sail trim and to steer the board.	Twist and sway to maneuver the board.	Shift weight to keep balance and to steer the board.	assemble the windsurfing equipment.	sail the board on the water.	adjust the sail to the wind.	sail over the water using a sailboard and a sail.
wrapping present	Tilt forward to read the instructions on the wrapping paper.	Pick up the paper and scissors and hold the paper in place while cutting.	Bend over to reach the paper and scissors and twist while cutting and taping.	Remain still to provide stability while wrapping the present.	gather the wrapping paper, scissors, and tape.	measure and cut the paper to fit the present.	tape the paper to the present and add decorations.	wrap the present.
wrestling	twist and turn to dodge and block attacks.	grab and hold opponents, as well as push and pull to gain leverage.	bend and twist to gain advantageous positions and to create space between opponents.	move in circles to create a strong base and to try to trip opponents.	prepare for the match.	engage in the physical match.	celebrate their victory.	move vigorously and grapple with an opponent.
writing	Move slightly from side to side to focus on the task.	Move steadily and precisely to form the letters or words on the page.	Remain relatively still in order to provide a stable base for the hands.	Remain in a comfortable position with minimal movement.	select a writing implement.	form letters and words on a writing surface.	review and revise their writing.	draw character shapes on paper.
yawning	tilt back slightly and open wide.	come up to the face and support the jaw.	slightly arch back as the mouth opens wide.	remain still.	open their mouth wide.	inhale deeply.	exhale slowly.	open their mouth wide, take a deep breath, and release it with a sigh.
yoga	Move in circles and side to side to increase flexibility in the neck and shoulders.	Be used to help balance in poses and to reach for the sky.	Twist, bend, and arch to open up the chest and back.	Be used to move into various poses and to stretch out the hips and quads.	prepare for the practice by setting up their mat and gathering any necessary props.	then begin the practice, engaging in physical postures, breathing exercises, and meditation.	conclude the practice with a few moments of relaxation.	move their body into various postures, stretching and breathing deeply.
zumba	Move side to side, and shake to the rhythm of the music.	Move in sync with the music, often in an exaggerated manner.	Twist and sway, following the movements of the arms and legs.	Step side to side, and kick outward with the feet.	warm up by stretching and doing light exercises.	follow a choreographed routine of dance moves to Latin-inspired music.	cool down with light stretching and breathing exercises.	dance energetically and rhythmically to Latin and energetic beats.

## Sheet: NTU-RGB+D
Action Labels	Head	Hands	Torso	Legs	Start	Middle	End	Global Desc
drink water	tilt back to drink	grasp the bottle or cup, lift it up to mouth.	lean forward to reach the cup or glass	remain still to support the body	Pick up the glass.	Bring it to their lips.	Take a sip.	pick up the glass, bring it to their lips, and take a sip.
eat meal/snack	Chew and swallow food.	Hold utensils and bring food to the mouth.	Support the body while eating.	Remain still while seated at the table.	Pick up food with utensils.	Bring it to their mouth to chew.	Swallow.	pick up food with utensils and bring it to their mouth to chew and swallow.
brushing teeth	tilt back slightly	hold toothbrush and move it in circular motions	remain still	remain still	Pick up a toothbrush.	Scrub teeth.	Rinse mouth.	pick up a toothbrush and scrub their teeth.
brushing hair	Move side to side to brush hair.	Grip the brush and move it through the hair.	Remain still to provide stability.	Remain still to provide stability.	Obtain brush or comb.	Move brush or comb through hair.	Style hair as desired.	brush their hair with a brush or comb.
drop	Lower quickly	Lower quickly	lower quickly	Bend slightly	Lower arm quickly.	Release object.	Drop.	lower their arm quickly and release the object they are holding.
pickup	Look at the object to be picked up.	Reach out and grasp the object.	Bend forward slightly to reach the object.	Remain stationary to provide a stable base for the movement.	Reach down.	Grab the object.	Lift the object.	reach down and grab the object.
throw	Tilt back slightly	Grip the object and propel it forward	Twist and rotate to generate momentum	Push off the ground to generate power	Lift arm quickly.	Release object with force.	Throw.	The person would quickly lift their arm and release an object with force.
sitting down	Lower slowly	Reach out to support the body	Bend at the hips and lower down	Bend at the knees and lower to the ground	Lower body towards seat.	Place buttocks on seat.	Straighten body into seated position.	lower themselves onto a seat and assume a seated position.
standing up (from sitting position)	Lift up and straighten.	Push off the chair arms or surface to help lift the body.	Straighten and lift up.	Straighten and bear weight to stand.	Straighten legs.	Push up with arms.	Lift body off seat.	straighten their legs and push up with their arms to lift their body off the seat.
clapping	Move up and down slightly.	Come together quickly and sharply.	Remain still.	Remain still.	Raise hands up.	Bring hands together.	Release hands.	clap their hands together.
reading	Move slightly from side to side as eyes scan the page.	hold the book steady and turn the pages	Remain still and upright.	Remain still and crossed or tucked beneath the body.	Grasp book.	Turn pages.	Reading.	be holding a book and turning the pages.
writing	Move slightly to focus on the paper.	Hold the pen and move it across the paper.	Remain still and upright to provide a stable base.	Remain still and provide support for the torso.	Grasping pen/pencil.	Moving pen/pencil on paper.	Completing the writing.	holding a pen or pencil and writing on a piece of paper.
tear up paper	Remain still	Rip the paper into small pieces.	Lean forward in concentration.	Remain still.	Crumple the paper.	Tear it into small pieces.	Dispose of the pieces.	crumple the paper and then tear it into small pieces.
wear jacket	Bend down to slip the jacket over	Push the arms of the jacket through and zip up the front.	Lean forward to ease slipping the jacket	remain stationary	Reach for the jacket.	Place the jacket on the body.	Fasten the jacket.	put on the jacket.
take off jacket	turn or tilt slightly to allow removal of the jacket	grasp the zipper at the front of the jacket and pull it down.	twist slightly toward one side.	Remain still.	Unzip jacket.	Pull off jacket.	Discard jacket.	unzip and remove the jacket.
wear a shoe	Remain stationary	reach for the shoe and grasp it, then insert foot into the opening.	Bend down to place the foot in the shoe.	Push the foot into the shoe and tie the laces.	Bend down.	Put foot into shoe.	Tie laces.	bend down and put their foot into the shoe, then tie the laces.
take off a shoe	Tilt slightly forward	Reach down and unbuckle the shoe or untie the laces.	Bend slightly forward	Lift the foot up to remove the shoe	Unlace the shoe.	Lift the shoe off the foot.	Remove the shoe.	unlace the shoe and remove it from their foot.
wear on glasses	tilt slightly downwards to accommodate the frame	grab the frame, then place it onto the nose.	Remain still to support head and hands.	Remain still to support torso.	Reach for the glasses.	Place the glasses on the nose.	Secure the glasses behind the ears.	put on the glasses.
take off glasses	tilt back slightly	reach up to the temples and gently remove the glasses	remain still	remain still	Grasp the glasses.	Lift the glasses away from the face.	Place the glasses away from the face.	remove the glasses from their face.
put on a hat/cap	tilt forward	Grasp the hat/cap and hold it in place.	slightly bow towards the hat to help align it	Remain still to help keep the hat/cap in place.	Pick up the hat/cap.	Place the hat/cap on the head.	Adjust the hat/cap.	place the hat/cap on their head.
take off a hat/cap	tilt slightly backward	Grasp the hat/cap and remove it from the head.	Lean forward slightly to aid in the removal of the hat/cap.	Remain stationary.	Reach up and grasp the hat/cap.	Lift it off their head.	Place the hat/cap aside.	reach up and grasp the hat/cap, then lift it off their head.
cheer up	tilt slightly upward	Clap	Stand up straight	Jump up and down	Raise arms in the air	Shout "Yay!"	Lower arms back down.	raise their arms in the air and shout "Yay!"
hand waving	Remain still	Move up and down in a waving motion	Remain still	Remain still	Extend arm.	Move hand back and forth.	Return arm to starting position.	wave their hand back and forth.
kicking something	tilt back to give momentum	Clench into fists	Twist to the side to generate momentum	Extend and strike the target	Raise leg	Thrust foot forward	Forcefully kick	raise their leg and forcefully thrust their foot forward.
reach into pocket	Tilt slightly forward.	Reach into pocket.	Lean slightly forward.	Remain stationary.	Extend arm.	Grasp pocket.	Insert hand.	reach their hand into their pocket.
hopping (one foot jumping)	Remain steady and upright.	Swing forward and backward in rhythm with the hopping.	Lean slightly forward to maintain balance.	Alternately lift and jump off the ground.	Jump off one foot.	Land on the same foot.	Jump off one foot	jump off one foot and land on the same foot repeatedly.
jump up	Lift up	Reach up	Bend backwards	Push off the ground	Lift body off ground.	Remain suspended in air.	Land back down.	quickly lift their body off the ground and land back down.
make a phone call/answer phone	tilt slightly to one side	Hold the phone and press the buttons.	remain upright and leaned forward slightly.	Remain still.	Pick up the phone.	Dial a number.	Speak into the receiver.	pick up the phone, dial a number, and speak into the receiver.
playing with phone/tablet	tilt downward to focus on the screen	Holding the device and tapping the screen.	Leaning forward to focus on the device.	Sitting or standing in a comfortable position.	Pressing and releasing the screen with a finger.	Swipe: Moving a finger across the screen in a single motion.	Moving the screen content up or down with a finger.	tap, swipe, and scroll on the device.
typing on a keyboard	Remain still, focused on the screen.	move across the keypad and type rapidly	Remain upright and steady.	Remain still and relaxed.	Positioning fingers on the keys.	Tapping the keys.	Removing fingers from the keys.	be tapping their fingers on the keys.
pointing to something with finger	Remain still	Extend one finger in the direction of the object	Remain still	Remain still	Extend arm.	Point finger.	Aim at object.	extend their arm and point their finger at the object.
taking a selfie	Tilt slightly to one side.	Hold the camera up and press the shutter button.	Stand up straight	Stand in a comfortable position.	Raise arm.	Hold phone up.	Take picture.	raise their arm, hold their phone up, and take a picture of themselves.
check time (from watch)	tilt slightly to the side to get a better view of the watch	reach up and grasp wrist watch.	Pivot slightly toward the watch to get a better view.	Remain still.	Locate watch.	Glance at watch.	Read time.	look at their watch.
rub two hands together	Remain still	Move back and forth quickly.	Remain still	Remain still	Place palms together.	Move palms in opposite directions.	Move palms in opposite directions.	rub their palms together.
nod head/bow	Move up and down slightly.	Remain still.	Remain still.	Remain still.	Tilt head downward.	Pause.	Tilt head back up.	tilt their head slightly downward and then back up again.
shake head	Move side to side rapidly.	Remain still.	Remain still.	Remain still.	Move head from side to side.	Quick, jerky motion.	Move head from side to side.	move their head from side to side in a quick, jerky motion.
wipe face	Move side to side to wipe face.	Move in circular motions to wipe face.	Remain stationary while head and hands move.	Remain stationary while head and hands move.	Extend arm.	Move hand across face.	Move hand across face.	use their hand to wipe their face.
salute	Tilt slightly forward	raise their right arm in a straight line above the head	Remain straight and upright	Remain still and straight	Raise arm.	Move arm sharply upwards.	Return arm to original position.	raise their right arm in a sharp, upward motion.
put the palms together	Remain still	Join together in front of the body	Remain still	Remain still	Bring hands up.	Place palms together.	Maintain prayer-like gesture.	bring their palms together in a prayer-like gesture.
cross hands in front (say stop)	Tilt slightly forward.	Cross in front of the body.	Remain still.	Remain still.	Cross arms in front of body.	Place left arm over right.	Uncross arms.	cross their arms in front of their body and say "Stop!"
sneeze/cough	jerk back	cover the mouth	contract	remain still	Cover mouth and nose.	Exhale forcefully.	Release hand.	cover their mouth and nose with their hand and expel air forcefully.
staggering	Rock back and forth	Reach out for balance	Lean from side to side	Move unsteadily and erratically	Taking steps	Unsteady steps	As if about to fall	take unsteady steps, as if they were about to fall.
falling	Drop suddenly	Reach out in an attempt to break the fall	Lean forward and twist to one side	Buckle and collapse beneath the body	Begin to lose balance.	Collapse downwards.	Reach the ground.	collapse to the ground.
touch head (headache)	Tense up	Reach up to the head and lightly massage the temples.	Remain upright and still.	Remain still and relaxed.	Extend arm towards head.	Place hand on head.	Lightly touch head.	lightly touch their head with their hand.
touch chest (stomachache/heart pain)	Tilt slightly forward	Place palms flat against chest and press gently.	hunch over	Remain still and steady while pressing hands against chest.	Place hand on chest.	Apply gentle pressure.	Hold for a few seconds.	place their hand on their chest.
touch back (backache)	tilt back and grimace in pain	Rub the back in circular motions.	Bend and twist the torso to stretch the back muscles.	Perform gentle stretches to loosen the back muscles.	Reach back.	Massage area.	Release.	reach back and massage the area of the backache.
touch neck (neckache)	Tilt chin up slightly.	reach up to alleviate tension in the neck muscles.	Keep the back straight and relaxed.	Remain still and relaxed.	Place hands on neck.	Gently rub neck.	Release hands.	gently rub their neck.
nausea or vomiting condition	throb and feel light-headed	grasp the stomach and press it	bend over and curl into a fetal position	Feel weak and unsteady	Experience nausea.	Vomit.	Vomit	experience nausea and/or vomit.
use a fan (with hand or paper)/feeling warm	Move side to side to direct the fan's airflow.	Hold or wave a piece of paper to create airflow.	Lean into the fan to feel the cool air.	Remain still to allow the fan to circulate the air.	Recognition of feeling warm.	Wave the fan with their hand.	Feel the cool air on the skin.	fan themselves with their hand or a piece of paper.
punching/slapping other person	jerk forward	swing out to make contact with the other person	twist and rotate to generate power for the punch	shift weight forward to add momentum to the punch	Extend arm.	Make contact with other person's body.	Use closed fist or open hand.	extend their arm and make contact with the other person's body with a closed fist or open hand.
kicking other person	Pull back to create momentum.	Clench into fists.	Twist to generate power.	Extend and strike the target.	Raise leg.	Extend foot.	Strike other person.	raise their leg and forcefully strike the other person with their foot.
pushing other person	Lean forward.	Push against the other person's body.	Move forward to apply pressure.	Push against the ground to generate force.	Extend hands or body.	Make contact with other person.	Push away.	push the other person away with their hands or body.
pat on back of other person	Remain still	Reach out and lightly pat the back of the other person	Lean forward slightly	Remain still	Extend arm.	Place hand on back.	Tap lightly.	lightly tap the other person's back with their hand.
point finger at the other person	Remain still	Extend one finger towards the other person	Remain still	Remain still	Extend arm.	Point index finger.	Aim at other person.	extend their arm and point their index finger at the other person.
hugging other person	Lean in close	Wrap around the other person	Press against the other person	Stand close together	Extend arms.	Wrap arms around other person.	Embrace.	wrap their arms around the other person in an embrace.
giving something to other person	Nod in acknowledgement.	Reach out to offer the item.	Lean forward to present the item.	Remain still to maintain balance.	Extend arm.	Hand out item.	Receive item.	extend their arm and hand to offer the item to the other person.
touch other person's pocket	Lean in close.	Reach out and lightly brush the pocket.	Move closer to the pocket.	Step closer to the pocket.	Extend arm towards pocket.	Grasp pocket fabric.	Insert hand into pocket.	reach into the other person's pocket.
handshaking	Nod in greeting.	clasp together and shake.	Lean in slightly.	Remain still.	Extend hand.	Grasp other person's hand.	Firmly shake hands.	extend their hand and grasp the other person's hand firmly.
walking towards each other	Move forward in the direction of the other person.	Swing in a natural walking motion.	Remain upright and balanced.	step forward in a balanced manner.	Start walking.	Take steps forward.	Move towards each other.	take steps forward in the direction of the other person.
walking apart from each other	Turn away from each other.	Swing freely at sides.	Twist away from each other.	Step away from each other.	Begin walking in the opposite direction.	Taking steps away from each other.	Increasing the distance between them.	take steps away from each other.
put on headphone	tilt slightly forward	reach up to the head and place the headphones over the ears.	stay still	Remain still while putting on the headphone.	Place headphone over ears.	Adjust headband.	Adjust the headband.	place the headphone over their ears and adjust the headband for a comfortable fit.
take off headphone	tilt slightly by raising one ear	Grasp the headphone and pull it away from the head.	Remain still while the hands and head move.	Remain still while the hands and head move.	Locate headphones.	Grasp headphones.	Remove headphones from ears.	remove the headphones from their ears.
shoot at the basketball	turn and look up towards the basket	Grip the basketball and release it.	Twist and extend to generate power for the shot.	Bend slightly and propel slightly upward	Raise arm.	Throw ball.	Aim at basket.	raise their arm and throw the ball towards the basket.
bounce ball	Turn to follow the ball	Catch and throw the ball.	Bend and twist to adjust the angle of the throw.	push off the floor to gain extra power and coverage.	Throw the ball up.	Catch the ball.	Return the ball to the ground.	drop the ball onto the ground and catch it after it bounces.
tennis bat swing	Move slightly forward and back to maintain balance.	Grip the bat firmly and swing it in an arc.	Rotate to generate power for the swing.	Remain stationary to provide a stable base for the swing.	Raise arm.	Swing bat forward.	Swing bat forward.	raise their arm and swing the bat forward in an arc.
juggling table tennis balls	look up and track the balls	Throw and catch the balls.	Keep the body balanced and upright.	maintain balance	Toss multiple balls.	Catch multiple balls.	Toss multiple balls.	toss and catch multiple table tennis balls in the air.
hush (quite)	Lower chin and tilt head slightly downward.	Place a finger to their lips.	Remain still and upright.	Remain still and close together.	Place finger to lips.	Make shushing sound.	Remain quiet.	put a finger to their lips and make a "shushing" sound.
flick hair	Quickly move side to side.	Reach up to the head and lightly brush the hair.	Remain still.	Remain still.	Move head to one side.	Move head back.	Hair moves with head.	quickly move their head to one side and back, causing their hair to move with it.
thumb up	Remain still	Raise the thumb up	Remain still	Remain still	Extend thumb.	Rotate thumb up.	Rotate thumb up.	raise their thumb up in a gesture of approval.
thumb down	Tilt slightly downward.	Extend the thumb downward.	Remain still.	Remain still.	Extend thumb and index finger.	Move fingers downward.	Point fingers downward.	extend their thumb and index finger downward in a downward motion.
make ok sign	Remain still	Form an "O" shape with the thumb and index finger	Remain still	Remain still	Form a circle with thumb and index finger.	Place the other three fingers straight.	Bring the thumb and index finger together.	make an "OK" sign by forming a circle with their thumb and index finger.
make victory sign	Remain upright.	Form a "V" shape with the index and middle fingers.	Remain still.	Remain still.	Raise hand.	Extend index and middle fingers.	Make victory sign.	raise their hand with their index and middle fingers extended.
staple book	Bend slightly forward	Open the book and press the stapler against the pages.	Lean slightly forward to steady the book.	Remain stationary to provide a stable base.	Grasp stapler.	Align pages.	Press stapler.	grasp the stapler in one hand, align the pages of the book, and press the stapler down to secure the pages together.
counting money	Focus on the task.	Pick up and sort the coins and bills.	Keep the body upright and steady.	Remain still to provide a stable base.	Sorting coins and bills.	Counting coins.	Counting bills.	be sorting and counting coins and bills.
cutting nails	Remain still	Grip the nail clippers and cut the nails.	Remain still to provide stability.	Remain still to provide stability.	Gather tools.	Trim nails.	Trim nails.	use scissors or clippers to trim their nails.
cutting paper (using scissors)	Steady the paper.	Hold the scissors and cut the paper.	Support the arms and hands.	Remain still and provide balance.	Grasp scissors and paper.	Move scissors in cutting motion.	Move scissors in cutting motion.	grasp the scissors in one hand and the paper in the other, then move the scissors in a cutting motion to separate the paper.
snapping fingers	Remain still	Quickly move together and apart	Remain still	Remain still	Bring fingers together.	Quickly move them apart.	Bring fingers together.	quickly bring their fingers together and apart in a snapping motion.
open bottle	Retract slightly back to gain leverage	Twist the bottle cap to open the bottle.	Lean forward to provide leverage for the hands.	Remain stationary to provide a stable base.	Grasp the bottle.	Twist the cap.	Open the bottle.	grasp the bottle and twist the cap to open it.
sniff (smell)	Raise and tilt slightly to bring nose closer to the smell.	move away slightly from the face	Remain still.	Remain still.	Inhale through nose deeply	Inhale through nose deeply	Inhale through nose deeply	inhale deeply through their nose.
squat down	Tilt slightly forward	Reach out in front	Bend at the hips and knees	Bend at the knees and lower the body	Bend knees	Lower body	Crouch	bend their knees and lower their body into a crouching position.
toss a coin	turn towards the coin	Hold the coin and release it.	Twist slightly up and the arms rise.	Remain stationary to provide stability.	Take coin in hand.	Raise coin up.	Throw coin into air.	take the coin in their hand, raise it up, and then throw it into the air.
fold paper	Focus on the paper.	Grasp the paper and fold it in half.	Lean forward to bring the hands closer to the paper.	Remain still to provide a stable base for the body.	Take the paper.	Fold it in half.	Fold it in half.	take the paper and fold it in half.
ball up paper	Focus on the paper.	Grasp the paper and crumple it into a ball.	Lean forward to reach the paper.	Remain stationary.	Take the paper.	Crumple it.	Form a tight ball.	take the paper and crumple it into a tight ball.
play magic cube	Focus on the cube and plan out the next move.	Manipulate the cube to rotate and move pieces.	Remain steady and provide support for the hands.	Remain still to provide a stable base.	Pick up the cube.	Twist and turn it to align the colors.	Solve the puzzle.	pick up the cube, twist and turn it to align the colors, and solve the puzzle.
apply cream on face	tilt back slightly.	scoop cream out and rub it into the face.	remain still.	remain still.	Take a small amount of cream in hands.	Gently massage cream into face.	Apply cream on face.	take a small amount of cream in their hands and gently massage it into their face.
apply cream on hand back	Remain still	Rub cream onto the back of the hand	Remain still	Remain still	Obtain cream.	Place cream on back of hands.	Rub cream into skin.	rub the cream onto the back of their hands.
put on bag	tilt downwards towards the bag.	Reach up and grab the bag, then place it on the shoulders.	bend forward slightly to allow arms to reach the straps	Stand up straight to support the weight of the bag.	Pick up the bag.	Put it on shoulder/back.	Secure the bag.	pick up the bag and put it on their shoulder or back.
take off bag	tilt slightly forward	grasp the bag straps	lean slightly forward	remain stationary	Unzip the bag.	Lift it off their shoulder.	Take off the bag.	unzip the bag and lift it off their shoulder.
put something into a bag	Look for the bag.	open the bag and place the item in	Bend down to reach the bag.	Move the body closer to the bag.	Pick up the item.	Move the item towards the bag.	Place the item into the bag.	pick up the item and place it into the bag.
take something out of a bag	Look into the bag.	Reach into the bag and grasp the item.	Lean forward to reach into the bag.	Remain stationary.	Reach into the bag.	Grab the item.	Pull out the item.	reach into the bag and pull out the item.
open a box	Look for the lid of the box.	Reach for the lid and lift it off.	Lean forward to get a better grip on the lid.	Remain stationary to provide stability.	Identify the box.	Grasp the lid.	Lift the lid.	lift the lid of the box.
move heavy objects	Steady and rotate to locate the object	Grip the object.	Bend and lift the object.	Push and support the weight of the object.	Lift the object.	Carry the object.	Place the object.	Lift and carry the objects.
shake fist	Remain still	Clench and shake	Remain still	Remain still	Clench fist.	Shake fist vigorously.	Shake fist vigorously.	clench their fist and shake it vigorously.
throw up cap/hat	jerk back to propel the cap/hat forward	Rapidly raise the arm holding the cap, and fling it away	Twist and throw the cap/hat up.	Remain stationary while throwing the cap/hat up.	Grasp the cap/hat.	Throw the cap/hat up.	Release the cap/hat.	throw their cap/hat up into the air.
hands up (both hands)	Lift chin slightly.	Reach up towards the sky.	Straighten and lift slightly.	Remain stationary.	Extend arms upward.	Rotate palms outward.	Raise arms above head.	raise their arms above their head, palms facing outward.
cross arms	Tilt slightly downward	Cross over each other	Remain upright	Remain still	Raise arms up.	Cross arms over chest.	Cross arms over chest.	cross their arms over their chest.
arm circles	Remain still	Move in circles	Remain still	Remain still	Raise arms up.	Rotate arms in circles.	Lower arms down.	move their arms in circles, rotating them at the shoulder.
arm swings	Remain still	Swing back and forth	Twist slightly from side to side	Remain still	Swing arms back.	Hold arms back.	Swing arms forward.	swing their arms back and forth.
running on the spot	Move up and down in a steady rhythm.	Swing back and forth in a steady rhythm.	Remain upright and steady.	Move up and down in a steady rhythm, propelling the body forward.	Lifting feet off the ground.	Bringing feet back down.	Quick succession.	be rapidly lifting their feet off the ground and bringing them back down in quick succession.
butt kicks (kick backward)	Remain upright and steady.	Remain at sides.	Lean slightly forward.	Kick backward, alternating feet.	Bend knee	Kick heel back	Heel touches buttocks	bend their knee and kick their heel back towards their buttocks.
cross toe touch	Lift up and tilt slightly	Reach across the body and touch the opposite toes	Twist slightly to the side	Lift the opposite leg and reach the toes with the opposite hand	Cross one foot over the other.	Reach down.	Touch toes.	cross one foot over the other and reach down to touch their toes.
side kick	Turn to the side.	Reach out to the side.	Twist to the side.	Extend out to the side and kick.	Extend leg out to side.	Kick with foot.	Return leg to starting position.	extend their leg out to the side and kick with the foot.
yawn	Open wide and tilt back slightly	Clasp together in front of the mouth	Expand and contract as air is inhaled and exhaled	Remain still	Open mouth wide.	Inhale deeply.	Exhale slowly.	open their mouth wide and inhale deeply, then exhale slowly.
stretch oneself	Reach up towards the sky.	Reach out to the sides.	Arch backwards.	Straighten and spread apart.	Extend arms outward.	Extend legs outward.	Extend arms and legs upward.	extend their arms and legs outward and upward.
blow nose	Tilt head slightly forward.	Place thumb and index finger on either side of the nose.	Remain still.	Remain still.	Pinch nostrils together.	Exhale forcefully.	Release nostrils.	pinch their nostrils together and exhale forcefully.
hit other person with something	turn towards the other person	Grip the object tightly and thrust it forward.	Twist and turn to generate momentum for the strike.	Stomp the ground to provide additional force for the strike.	Raise arm.	Swing arm.	Strike other person.	swing their arm and strike the other person with the object.
wield knife towards other person	Turn towards the other person.	Grip the knife handle.	Lean forward slightly.	Remain steady and balanced.	Raise knife.	Point knife towards other person.	Threaten with knife.	raise the knife threateningly.
knock over other person (hit with body)	collide with other person's head	Push against the other person's shoulders.	Ram into the other person's torso.	Step forward to provide propulsion.	Approach the other person.	Push them forcefully.	Knock them over.	push forcefully
grab other person’s stuff	Turn to face the other person's stuff.	Reach out and grasp the item.	Lean in to get a better grip on the item.	Remain steady to provide balance while grabbing the item.	Reach out.	Grasp the item.	Take the item.	reach out and take the other person's stuff.
shoot at other person with a gun	align sight with the target.	grip the gun firmly and pull the trigger.	Steady the gun.	Balance the body.	Raise the gun.	Aim.	Pull the trigger.	raise the gun, aim, and pull the trigger.
step on foot	lower slightly	Reach out for balance.	Shift weight onto the foot.	Push off the ground to step forward.	Lift foot.	Place foot on ground.	Shift weight onto foot.	lift one foot and place it down on the ground.
high-five	tilt slightly back	come together in a clapping motion	lean slightly forward	remain stationary	Raise hand.	Slap against another person's hand.	Lower hand.	raise their hand and slap it against another person's hand.
cheers and drink	Tilt back and swallow the drink.	Hold the glass and bring it to the mouth.	Lean forward slightly to bring the glass to the mouth.	Remain stationary to provide balance.	Raise their glass	Clink glasses together.	Take a sip.	raise their glass, take a sip, and smile.
carry something with other person	Steady the object.	Grip the object.	Balance the object.	Support the weight of the object.	Lift the object.	Hold it.	Hold it.	lift the object and hold it while the other person takes the other end.
take a photo of other person	Tilt slightly to the side.	Hold the camera steady.	straighten and point the camera.	Stand firmly in place.	Point camera at other person.	Press shutter button.	Take photo.	point their camera at the other person and press the shutter button.
follow other person	Turn to face the other person.	extend forward when walking.	Move in the same direction as the other person.	Walk in the same direction as the other person.	Locate the other person.	Walk behind them.	Walk behind them.	walk behind the other person.
whisper in other person’s ear	Lean in close	reach up and cup the ear of the other person.	Move closer to the other person	Remain still and steady	Lean close to the other person.	Speak softly into their ear.	Whisper in other person's ear.	lean close to the other person and speak softly into their ear.
exchange things with other person	turn towards the other person.	Reach out and take the item from the other person.	Lean forward to facilitate the exchange.	Remain still to maintain balance.	Reach out.	Hand the item.	Receive item.	reach out and hand the item to the other person.
support somebody with hand	Tilt slightly forward.	Reach out and grasp the other person's arm or shoulder.	Lean in slightly to provide additional support.	Plant feet firmly on the ground for stability.	Place hand on other person's back or shoulder.	Support somebody.	Support somebody.	place their hand on the other person's back or shoulder in a comforting gesture.
finger-guessing game (playing rock-paper-scissors)	Think of the hand gesture to choose	Make a rock, paper, or scissors hand gesture.	sway slightly in anticipation.	Remain still while playing the game.	Make a fist with thumb and index finger extended.	Quickly open hand to reveal rock, paper, or scissors.	Show either a closed fist, flat hand, or index and middle finger extended.	make a fist with their thumb and index finger extended, then quickly open their hand to reveal either a rock (closed fist), paper (flat hand), or scissors (index and middle finger extended).

## Sheet: NW-UCLA
Action Labels	Head	Hands	Torso	Legs	Start	Middle	End	Global Desc
pick up with one hand	Slightly tilt down to view the object.	Reach out, open, grasp object, then retract.	Slightly bend forward, then straighten up.	Provide balance, slightly bend if needed.	extend their arm towards the object.	grasp the object firmly with their hand.	lift the object using their arm strength.	extend their arm, open their hand, grasp the object securely, and then lift it by retracting their arm upwards.
pick up with two hands	Lower slightly, eyes focusing on the object	Extend, grip object, then retract	Bend forward slightly to reach object	Slightly bend at knees for balance	approach and position themselves near the object.	bend down, extending both hands towards the object.	grasp the object firmly and lift it upwards.	bend their knees slightly, lean over the object, grasp it firmly with both hands and lift by straightening their knees and keeping their back straight.
drop trash	Look down at the trash and the trash bin.	Release grip to drop the trash into the bin.	Slightly bend forward, aligning with the hands' motion.	Remain stationary, providing balance for the upper body.	collect the trash.	walk towards the trash bin.	release the trash into the bin.	identify unwanted items, carry them to a designated waste container, and then release their hold, effectively disposing the trash into the bin.
walk around	Slightly bob with each step, eyes surveying the environment.	Swing gently back and forth in rhythm with the steps.	Shift slightly side to side with each leg movement.	Alternate stepping forward, bending at the knee, foot rolling heel to toe.	stand upright and shift their weight onto one foot.	move the other foot forward while maintaining their balance.	repeat the process, alternating feet as they progress forward.	move forward by placing one foot in front of the other repeatedly, while shifting their weight and maintaining balance.
sit down	Slightly tilt forward	Grasp table edge or armrests for support	Lean back and lower down	Bend at the knees and retract.	approach the chair.	turn around facing away from the chair.	bend their knees and lower their body onto the chair.	approach the seat, turn around, bend their knees and lower their body until they're resting on the seat, then adjust for comfort.
stand up	Lift upwards, aligning with the spine.	Push off from the ground or armrests.	Straighten, engaging core muscles.	Bend at knees, then straighten to lift body upwards.	shift their weight forward.	push off from their seat using their hands.	straighten their knees and back to a standing position.	initially bend the knees, press their feet into the ground, and gradually extend the legs to lift the torso and head, achieving a vertical position.
donning	Tilt down to observe the clothing or gear.	Grasp, position and secure the clothing or gear.	Flex and turn as necessary to allow clothing to fit.	Step into pants or shoes, stand or sit as needed.	choose appropriate clothing.	put on the chosen clothing item by item.	adjust and secure each piece for a proper fit.	be putting on or dressing in clothes or special equipment.
doffing	Slightly tilt downwards.	Reach for clothing, then pull it off.	Assist in the removal of clothing.	Stabilize body, may step out if removing pants.	unbutton or loosen the garment.	gently remove the garment without causing damage.	neatly fold or hang the garment.	remove or take off a piece of clothing or item from their body.
throw	Focus on the target.	Grip, swing back, then release object forward.	Twist with the throwing arm for momentum.	Stabilize body, pivot and push off for power.	position themselves and grip the object firmly.	swing their arm back, building momentum.	release the object, aiming at the target.	grasp an object firmly, swing their arm in the direction they want to propel it, and then release it.
carry	Stay upright, eyes focused on the path ahead.	Grasp object firmly, arms flexed.	Engage core muscles for stability.	Bend slightly at knees, move steadily forward.	bend their knees, keeping the back straight.	securely grip the object, distributing weight evenly.	lift using their leg muscles, maintaining a straight back.	lift, support, or transport a certain item from one place to another using their hands, arms, or on their back.

## Sheet: UTD-MHAD
Action Labels	Head	Hands	Torso	Legs	Start	Middle	End	Global Desc
Swipe left	Remain steady, eyes focused on the screen.	Glide left across the screen.	Stay mostly stationary, slight lean forward.	Be stable, maintaining balance.	position their finger on the right side of the screen.	quickly move their finger horizontally to the left side.	lift their finger, completing the leftward swipe motion.	place their finger on the screen and quickly drag it to the left, lifting it off of the surface.
Swipe right	Stay stationary, eyes focused on the screen.	Move rightward across the screen.	Remain still, maintaining upright posture.	Stay still, supporting the body.	unlock their smartphone or tablet.	open the specific application.	swipe their finger right across the screen.	touch the screen with their finger, slide it from the left side to the right side and release.
Wave	Remain steady, looking towards the person you are waving at.	Raise one hand, move it side to side in a waving motion.	Stay upright and stationary.	Stand firm, providing balance.	raise their hand to shoulder height.	open their hand, spreading their fingers apart.	move their hand side to side.	extend their arm and move their hand back and forth, typically in greeting or as a signal.
Clap	Stay still, eyes focused on hands.	Swiftly move towards each other, palms meeting in middle.	Remain upright and stationary.	Stand firm and still for balance.	position both hands parallel to each other.	swiftly bring their hands together.	generate sound by the impact, then separate hands again.	bring both palms together repeatedly to create a sound, often to show appreciation or enthusiasm.
Throw	Aim at the intended direction of the throw.	Grip object, pull back, then swiftly thrust forward.	Twist and lean forward for momentum.	Stabilize body, then shift weight for power.	position themselves, aiming at the target.	gather momentum, pulling their arm back.	release the object, following through with their arm.	grasp an object firmly, retract their arm, then rapidly extend it forward, releasing the object with force towards a specific direction.
Arm cross	Remain upright and facing forward.	Move across body to opposite arms.	Stay straight, slight lean backward.	Remain stationary, providing balance.	stand straight with arms relaxed at their sides.	lift their arms to chest level.	cross one arm over the other, folding them together.	"arm cross" by folding their arms together over their chest, usually with one hand resting on each bicep.
Basketball shoot	Stay focused on the basket.	Grip ball, extend, and flick wrist for shot.	Lean back slightly, then push forward.	Bend at knees, then extend to propel body upwards.	position themselves facing the basketball hoop.	balance the ball in their dominant hand.	push off their feet, extending their arm to shoot the ball.	grip the ball, bend their knees, align their shooting elbow with the rim, push off their legs, extend their shooting arm, and release the ball towards the basket.
Draw 'X'	Look down at the paper, following the movement of the hand.	Make two diagonal lines intersecting in the middle.	Lean slightly forward towards the drawing surface.	Remain steady, providing balance while seated or standing.	draw a diagonal line from top left to bottom right.	lift the writing tool off the paper.	then draw another diagonal line from top right to bottom left.	draw two diagonal lines that intersect in the middle to form the letter 'X'.
Draw circle (clockwise)	Stay still, eyes following hand's movement.	Move in a clockwise circular motion.	Remain stationary, slight lean forward.	Provide balance, remain mostly stationary.	start at the top center point.	move their hand in a rightward motion curving downwards.	continue the curve upwards, completing the circle clockwise.	take a pen, start at a point, move it rightward creating a rounded line, continue it up, left and down back to the start point.
Draw circle (counter clockwise)	Remain focused on the drawing surface	Move in a counter clockwise motion	Stay still, slightly leaning forward	Stand firmly, provide balance	choose a starting point on the paper.	move their pen leftwards to create a semi-circle.	continue the motion to complete the full circle counter clockwise.	start at a point, move their pen in a circular motion to the left, continuing until they meet the starting point.
Draw triangle	Look down at the paper, following the hand movement.	Hold a pencil and draw three connected lines.	Lean slightly forward for better vision.	Stay steady and support the body's posture.	draw a straight line as the base of the triangle.	draw two more lines from the ends of the base.	ensure the two lines meet at a point to form a triangle.	start by making three straight lines that connect to form three angles or corners, each line representing a side of the triangle.
Bowling	Look forward, focusing on the bowling pins.	Grip bowling ball, swing, and release.	Lean forward slightly during the throw.	Take a few steps, one sliding forward on release.	select a suitable ball and approach the lane.	aim, then swing their arm back.	release the ball towards the pins.	select a bowling ball, aim for the pins, swing their arm back and then forward, releasing the ball down the lane.
Boxing	Dodge and weave, keeping eyes on opponent.	Jab, cross, hook, and uppercut in fast succession.	Rotate and flex for powerful punches.	Shuffle, pivot, and move for balance and mobility.	wrap hands, wear gloves and warm up.	practice punches, footwork, and defensive techniques.	spar with an opponent or hit a punching bag.	throw punches at an opponent, master defensive techniques, and follow specific rules while boxing inside a ring, requiring physical strength and strategic skills.
Baseball swing	Focus on the incoming ball.	Grip bat, pull back, then swing forward.	Rotate rapidly towards the pitch.	Pivot on the back foot, front foot steps forward.	position feet shoulder-width apart, knees slightly bent, gripping the bat.	rotate hips and torso, transferring weight onto the front foot.	swing the bat, maintaining eye contact with the ball, and follow through.	position themselves perpendicular to the pitcher, grip the bat with both hands, step forward with the non-dominant foot, and swing the bat toward the ball.
Tennis swing	Stay focused on the incoming ball.	Grip racket, swing from low to high.	Twist for power, then follow through.	Step forward, pivot, and provide balance.	position themselves, aligning with incoming ball.	swing the racket, transferring weight forward.	follow through, completing the swing.	hold the racket firmly, pivot their body towards the ball, bend their knees for balance, and smoothly swing the racket through the ball's path.
Arm curl	Remain facing forward, steady and upright.	Grip the weights and bend towards the shoulders.	Stay upright, without leaning or swaying.	Stand steady and shoulder-width apart for balance.	stand upright, holding a weight with palm facing forward.	bend their elbow, raising the weight towards the shoulder.	slowly lower the weight back to the starting position.	hold weights in each hand, bend their elbows, and lift the weights towards their shoulders, then lower them back down.
Tennis serve	Look at the target area and keep eyes on the ball.	Toss ball up and swing racket overhead.	Rotate back then forward in sync with arm swing.	Bend slightly then push off ground for added power.	stand behind baseline, bounce ball, and grip racket correctly.	toss ball upward while pulling racket back.	swing racket forward, meeting ball at highest point for serve.	bounce the ball, position it over their head, swing their racket back, then swiftly strike, sending the ball over to the opponent's court.
Push	Tilt slightly forward, focusing on the object.	Extend, palms facing out, applying force.	Lean into the direction of the push.	Stabilize body, one foot stepping forward.	position themselves firmly behind the object.	place their hands evenly on the object.	apply force steadily in the desired direction.	exert force onto an object, moving away from their body, often using their hands or body weight.
Knock	Slightly lean forward, eyes focused on the door.	Ball into a fist, lift and strike door.	Lean slightly forward with hands' movement.	Maintain balance, slight shift of weight forward.	approach the intended door.	form a fist with their hand.	tap the door with their fist repeatedly.	make a fist and rap their knuckles against a door or surface, usually in a rhythmic pattern, to draw attention.
Catch	Turn towards the incoming object, eyes tracking it.	Extend forward, palms open to grasp the object.	Slightly lean forward, adjusting for balance.	Bend knees slightly, ready to adjust position if needed.	position hands towards the incoming object.	adjust stance for balance and object's trajectory.	close hands around the object, securing it.	extend their hands, visually track the incoming object, and close their hands fast once the object makes contact to secure it.
Pickup and throw	Look down at object, then at target.	Bend down, grasp object, and throw.	Bend over, then twist and lean back.	Flex for balance, then push off for throw.	bend down and grasp the object securely.	stand upright, shifting weight to the back foot.	thrust forward, releasing the object.	bend down, grasp the object firmly, straighten their body, then with a swift arm motion, hurl the object forwards or upwards.
Jog	Stay steady, slightly tilted forward.	Swing gently in rhythm with the legs.	Keep straight, slightly lean forward.	Bend and stretch alternatively, maintaining a steady pace.	start with a slow, steady pace to warm up their muscles.	gradually increase their pace, maintaining a rhythmic stride.	slow down, ending their jog with a cool-down walk.	jog by running at a steady, moderate pace, keeping a rhythmic movement of arms and legs, and maintaining a shallow breathing pattern.
Walk	Stay steady, eyes forward, slight bobbing with each step.	Swing gently back and forth in rhythm with steps.	Stay upright, slight twisting motion with each step.	Alternately step forward, bend at the knee, and push off with foot.	shift weight to one foot, lifting the other.	swing the lifted foot forward, landing heel-first.	shift weight forward, starting the cycle with the other foot.	move forward by stepping one foot in front of the other alternately, transferring weight from one leg to the other.
Sit to stand	Stay level, eyes looking straight ahead.	Push off knees or armrests for support.	Lean slightly forward to shift weight.	Straighten to lift body into standing position.	shift their weight forward towards the edge of the seat.	push off the chair using their arms and legs.	straighten their legs and back to stand upright.	start seated, then push off from their chair using their hands and straighten their legs to transition from a sitting to a standing position.
Stand to sit	Lower slightly as the body changes position.	Reach out for support or balance.	Bend forward, aligning above hips.	Bend at the knees, lowering the body to a sitting position.	position feet shoulder-width apart, slightly behind the knees.	bend the knees and hips, leaning the torso forward.	lower their body until seated, using arms for balance if needed.	shift body weight, bend knees and hips, then gradually lower their body until fully seated.
Lunge	Stay upright, eyes focused forward.	Either extend forward or stay on hips.	Lean forward slightly, maintaining balance.	One steps forward, knee bent, other leg straight behind.	stand straight with feet hip-width apart.	step forward with one foot, bending both knees.	push back up, returning to the starting position.	take a big step forward, bending the forward knee at 90 degrees, keeping the back straight and the rear knee just above the ground.
Squat	Stay facing forward, eyes looking straight ahead.	Extend forward for balance.	Lean slightly forward, keeping back straight.	Bend at the knees, lowering body to the ground.	stand straight, feet shoulder-width apart.	bend knees, lowering body into a squat position.	then return to standing position, repeating the exercise.	stand with feet shoulder-width apart, bend knees, lowering hips as if sitting down, then return to upright position.

## Sheet: UWA3DII
Action Labels	Head	Hands	Torso	Legs	Start	Middle	End	Global Desc
one hand waving	Stay steady, facing forward.	One hand raised, moving side to side in a waving motion.	Remain upright and still.	Stand firm and balanced.	raise one arm.	keep their palm open and facing outward.	move their hand side to side.	raise one arm, keeping the hand relaxed, and move it back and forth gently in a waving gesture.
one hand Punching	Stay focused on the target.	One retracts, other clenches into fist and thrusts forward.	Twist slightly towards the target.	Pivot on balls of feet for power and stability.	stand firm with a clenched fist ready to punch.	rotate the torso, driving the punch forward.	swiftly retract the fist, returning to the initial position.	position their body correctly, tighten their fist, then thrust it forward swiftly and forcefully, striking the target with the top two knuckles.
two hand waving	Stay still, possibly nodding or tilting in rhythm with the hand movements.	Move side to side in a waving motion simultaneously.	Remain upright, possibly swaying slightly with the hand movements.	Stand firm, providing balance for the rest of the body.	lift their arms parallel to the ground.	open their palms facing forward.	rapidly swing their arms side to side.	extend both arms and rhythmically move them back and forth, signaling or acknowledging someone or something.
two hand punching	Tilt slightly forward, eyes focused on target.	Clench into fists, extend forward in alternating succession.	Rotate with each punch, providing power.	Stay grounded, bending slightly for balance and power.	position feet shoulder-width apart, hands clenched in fists at chest level.	extend both arms straight out, aiming for an imaginary target.	swiftly pull hands back to starting position, ready for repeat.	stand, align their fists with the target, and alternately thrust each fist forward, maintaining balance and power in their strikes.
sitting down	Maintain balance, looking forward	Reach out for armrest or balance	Bend slightly at the hips	Bend at the knees descending downwards	approach the seating area.	bend their knees and hips.	lower their body onto the seat.	bend their knees, lower their body towards the chair or ground, and then position their weight on their buttocks.
standing up	Lift upward, maintaining alignment with the spine.	Push against the ground or armrest for support.	Straighten, aligning with the legs.	Extend fully, shifting weight to the feet.	shift weight forward towards the edge of the seat.	place hands on thighs, pushing upwards.	straighten legs and stand upright.	shift their weight forward, use their arms for support, and push their body upwards until standing upright.
vibrating	Shake rapidly side to side or up and down.	Tremble quickly in uncontrollable movements.	Shudder and jolt back and forth swiftly.	Quiver, causing unsteady, fast-paced motion.	start to shake gently, initiating the vibration.	intensify the shaking, reaching peak vibration.	gradually reduce the shaking, ending the vibration.	be trembling or shaking involuntarily, often as a reaction to excitement, nervousness, or physical exertion.
falling down	Tilt downwards, losing balance and control.	Flail or reach out attempting to break the fall.	Lean forward or sideways, collapsing under lost balance.	Buckle or slip, failing to support the body's weight.	lose their balance or footing.	attempt to brace or correct themselves.	land, absorbing the impact with their body.	lose balance, stumble, and end up landing on the ground involuntarily.
holding chest	Tilt down slightly, eyes focused on chest.	Move towards chest, palms flat against it.	Lean slightly forward, accommodating hand placement.	Stay firm, providing balance and support.	clasp their hands over the chest area.	wince, showing signs of discomfort or pain.	slump slightly, struggling to maintain posture.	bring their hand or hands up to their chest area, typically clutching or grasping at their clothing or skin.
holding head	Remain stationary, facing forward	Rise and gently cradle both sides of the head	Stay upright, slightly leaned back	Stand firm for balance, slightly apart	raise both hands towards their head.	place their fingers on their temples.	apply pressure, visibly expressing discomfort or stress.	place their hands on either side of their head, often applying slight pressure in a self-comforting gesture.
holding back	Tilt slightly downwards, avoiding direct eye contact.	Be drawn towards the body, possibly clenched.	Lean backwards, creating distance.	Be positioned slightly backwards, ready for retreat.	suppress personal feelings or reactions.	avoid confrontation or discord.	limit self-expression or interaction with others.	restrain their emotions or actions, often to avoid confronting a difficult situation or hurting another person's feelings.
walking	Remain steady, eyes looking forward.	Swing gently opposite to the leg movements.	Shift slightly side to side with each step.	Alternate bending and extending to move forward.	shift weight to one foot, lifting the other.	swing the lifted foot forward, landing heel first.	shift weight to the forward foot, repeating the process.	move one foot forward at a time, shifting their weight between each step while maintaining their balance.
irregular walking	Bobble inconsistently, changing direction frequently.	Swing irregularly, sometimes jerking abruptly.	Shift unevenly, occasionally lurching to one side.	Step unpredictably, varying stride and pace.	stagger unsteadily, unable to maintain a straight line.	frequently stumble, catching themselves from falling.	display inconsistent pacing, altering between fast and slow steps.	walk with inconsistent strides, alternating pace, and possibly a limp, showing difficulty in maintaining a steady rhythm or direction.
lying down	Lower gently onto a horizontal surface.	Position themselves at the sides.	Align horizontally with the surface.	Extend out straight and relax.	approach and position themselves beside the bed.	slowly bend their knees and recline their body.	adjust their position to lie flat and comfortable.	lie horizontally by placing their body flat on a suitable surface, such as a bed or the ground, generally with their face up.
turning around	Rotate to look over the shoulder.	Swing slightly for balance.	Twist in the direction of the turn.	Pivot on the balls of the feet.	pivot on their heel, initiating the turn.	swing their body around in a 180-degree motion.	finalize the turn, facing in the opposite direction.	rotate their body 180 degrees in either direction, shifting the position of their feet while maintaining balance.
drinking	Tilt backwards slightly as liquid is swallowed.	Lift the cup to the mouth.	Remain stationary, minimal movement.	Stay still, support body's balance.	pick up the glass with their dominant hand.	then bring the glass to their lips gently.	finally tilt the glass and sip the liquid.	lift a container with a liquid, bring it to their lips, tilt it, allowing the liquid to flow into their mouth, swallow and repeat as desired.
phone answering	Turn towards the sound of the ringing phone.	Reach out, grasp the phone, and bring it to the ear.	Lean slightly to support hand movement.	Remain stationary, or move if the phone is distant.	hear the phone ring.	pick up the phone.	greet the caller and start conversing.	pick up the incoming call, greet the caller, listen to their queries or messages, respond accordingly, and end the call professionally.
bending	Lower slightly, looking downwards.	Hang down or extend for balance.	Bend forward at the waist.	Remain fairly straight, slightly bend at knees.	stand upright, feet hip-width apart.	flex their knees and hips, leaning forward.	reach down, fully bending at the waist.	flex or curve their body part, typically a joint like an elbow or knee, while keeping the rest of their body stationary.
jumping jack	Stay steady, facing forward.	Swing up and down, meeting above head and at thighs.	Remain upright and stationary, only slightly twisting.	Jump open and close, in sync with the arms.	stand straight with feet together and arms at the sides.	simultaneously jump, spread legs, and raise arms above the head.	quickly return to the initial standing position.	stand upright, jump to spread their legs and raise their arms, then jump again to return to the original position.
running	Stay level, slightly lean forward, eyes looking ahead.	Pump in coordination with opposite leg, elbows bent.	Lean forward slightly, remain firm, with minimal rotation.	Propel body forward through a cycle of driving, swinging, and landing.	start with a brisk walk to warm up their muscles.	increase pace, transitioning into a steady jog.	sprint, using maximum effort and speed.	propel themselves forward quickly, using their feet and legs to push off the ground and move at a faster speed than walking.
picking up	Look down at the object to be picked up.	Reach down, grasp object firmly.	Bend forward slightly, maintaining balance.	Bend at the knees, then straighten to lift.	approach the object with knees bent.	firmly grasp the object with both hands.	straighten their knees, lifting the object.	bend over or squat, grasp the object securely, then straighten their body to lift it.
putting down	Lower slightly, eyes focus on the object and the spot where it will go.	Release the grip on the object, guide it to the intended spot.	Bend slightly if needed, maintain balance during the action.	Remain stable, adjust position if needed for better balance.	identify a target's weaknesses.	make negative remarks about these weaknesses.	belittle the target's accomplishments.	be "putting down" by verbally expressing negative comments or criticisms towards another individual, often intending to demean or belittle them.
kicking	Stay focused on the target.	Balance, often opposite to kicking leg.	Rotate slightly for balance and power.	One leg supports, other leg swings forward to kick.	position their body and aim the target.	lift their leg and swing it forward.	make contact and then withdraw the foot quickly.	lift their leg and swiftly extend the foot or knee to contact an object with force, generally using the heel or ball of the foot.
jumping	Remain aligned with the body, slightly tilted forward.	Swing up for momentum and balance.	Contract, then extend rapidly in mid-air.	Bend at the knees, then forcefully extend to propel upwards.	bend their knees and lower their body.	push off the ground using their leg muscles.	land softly, absorbing the impact with their knees.	bend their knees, propel themselves upwards using their leg muscles, extending their legs and body in mid-air before landing back on their feet.
dancing	Bob rhythmically to the beat of the music.	Wave and snap in sync with rhythm.	Rotate and sway in harmony with the music.	Step and kick in time with the beat.	start swaying rhythmically to the beat of the music.	then execute precise footwork and body movements.	conclude with a dramatic spin and pose, ending the dance.	move rhythmically to music, typically following a set sequence of steps, expressing emotions through graceful or energetic movements.
moping floor	Look down, observing the cleaning process.	Grip mop, moving it back and forth.	Lean forward slightly, following hands' motion.	Shift weight, occasionally stepping to new spots.	prepare the mop and bucket with cleaning solution.	then thoroughly mop the floor, covering all areas.	finally rinse the mop and empty the bucket.	gather necessary tools, wet the mop in a bucket of cleaning solution, then sweep it across the floor in back-and-forth motions.
sneezing	Snap forward quickly during the sneeze.	Cover mouth and nose to contain the sneeze.	Contract slightly due to force of sneeze.	Remain steady to maintain balance.	feel a tickle in their nose.	take a deep breath in preparation.	forcefully expel the breath through the nose and mouth.	inhale sharply, then forcefully expel air from the lungs through the nose and mouth due to irritation or particles in the nasal passages.
sitting down	Slightly tilt downwards.	Reach out for the armrest or thighs.	Bend at the hips, leaning backwards.	Bend at the knees, feet flat on the floor.	approach and position themselves in front of the chair.	bend their knees, shifting weight towards the chair.	settle their body comfortably on the chair, adjusting as needed.	bend their knees and lower their body until they are resting on a chair or similar surface.
squatting	Stay aligned with the spine, gazing forward.	Extend forward for balance.	Lean forward slightly while maintaining a straight back.	Bend at the knees, lowering the body downward.	stand straight with feet shoulder-width apart.	bend their knees, lowering their body.	rise back to starting position.	stand with their feet shoulder-width apart, then bend their knees and hips to lower their body as if sitting, then stand again.
coughing	Tilt forward slightly with each cough motion.	Cover mouth or hold chest, depending on intensity.	Contract quickly, force air out of lungs.	Stay relatively still, may slightly bend if cough is strong.	take a sharp intake of breath.	contract their chest muscles forcefully.	expel air rapidly from the lungs, producing a cough sound.	forcibly expel air through the mouth, often as a reflex to clear the throat or lungs of mucus, irritants, or foreign particles.
